# Supplementary material for: Amelioration of Metabolic Syndrome-Associated Cognitive Impairments in Mice via a Reduction in Dietary Fat Content or Infusion of Non-Diabetic Plasma
Source: PubMed Central journal article supplement — eBioMedicine. 2015 Dec 12;3:26–42. doi: 10.1016/j.ebiom.2015.12.008 (PMC4739422; doi:10.1016/j.ebiom.2015.12.008), 2015-12-12
Supplement: mmc1.pdf [file mmc1.pdf]

| Peak Name                                                     | HMDB ID   |
|---------------------------------------------------------------|-----------|
| (2E)-Dodecenoyl-CoA                                           | HMDB03712 |
| (2E)-Octenoyl-CoA                                             | HMDB03949 |
| (S)-3-Hydroxydodecanoyl-CoA                                   | HMDB03936 |
| 1. 4-Pregnene-17alpha,21-diol-3,20-dione                      | HMDB00015 |
| 13-HODE                                                       | HMDB61708 |
| 14,15-DiHETE                                                  | HMDB10204 |
| 18-Hydroxycorticosterone                                      | HMDB00319 |
| 1-Monopalmitin                                                | HMDB11533 |
| 2,6 dimethylheptanoyl carnitine                               | HMDB06320 |
| 27-hydroxy-cholesterol(d6)                                    | HMDB02103 |
| 2-Hydroxybutric acid                                          | HMDB00008 |
| 3(4-HYDROXYPHENYL)LACTATE                                     | HMDB00755 |
| 3'-AMP                                                        | HMDB03540 |
| 3-Hydroxycapric acid                                          | HMDB02203 |
| 3-Hydroxy-cis-5-tetradecenoylcarnitine                        | HMDB13330 |
| 3-Hydroxymethylglutaric acid                                  | HMDB00355 |
| 3-Methylglutaryl carnitine                                    | HMDB00552 |
| 3-Methylhistidine                                             | HMDB00479 |
| 3-Oxododecanoyl-CoA                                           | HMDB03937 |
| 4alpha-formyl-4beta-methyl-5alpha-cholesta-8,24-dien-3beta-ol | HMDB12167 |
| 4-HYDROXYBENZALDEHYDE                                         | HMDB11718 |
| 4-Hydroxyproline                                              | HMDB00725 |
| 4-Phosphopantothenoylcysteine                                 | HMDB01117 |
| 4-Trimethylammoniobutanoic acid                               | HMDB01161 |
| 5,6-DHET                                                      | HMDB02343 |
| 5-Aminopentanoate                                             | HMDB03355 |
| 5-Hydroxy-L-tryptophan                                        | HMDB00472 |
| 5-KETE                                                        | HMDB10217 |
| 6,8-Dihydroxypurine                                           | HMDB01182 |
| 9,12-Hexadecadienoylcarnitine                                 | HMDB13334 |
| 9E,11E-Octadecadienoic acid                                   | HMDB05047 |
| 9-HETE                                                        | HMDB10222 |
| 9-HODE                                                        | HMDB10223 |
| Acrylyl-CoA                                                   | HMDB02307 |
| Adenosine diphosphate ribose                                  | HMDB01178 |
| ADP                                                           | HMDB00061 |
| ADP                                                           | HMDB01341 |
| Allantoin                                                     | HMDB00462 |
| Allodeoxycholic acid                                          | HMDB00478 |
| Alpha-Linolenic acid                                          | HMDB01388 |
| Amino adipic acid                                             | HMDB00510 |
| Arachidonic acid                                              | HMDB01043 |
| Arginine                                                      | HMDB00517 |
| Asymmetric dimethylarginine (ADMA)                            | HMDB01539 |
| Biliverdin                                                    | HMDB01008 |
| Biotin                                                        | HMDB00030 |
| CE(12:0)                                                      | HMDB02262 |

|                                             |           |
|---------------------------------------------|-----------|
| Cer(d16:1(4E)/24:0(2OH))                    | NA        |
| Cer(d18:0/23:0)                             | HMDB11767 |
| Cervonyl carnitine                          | HMDB06510 |
| Chenodeoxycholic acid                       | HMDB00518 |
| Cholesterol (-H2O)                          | HMDB00067 |
| Citric acid                                 | HMDB00094 |
| Citrulline                                  | HMDB00904 |
| Creatine                                    | HMDB00064 |
| Creatinine                                  | HMDB00562 |
| Cytidine                                    | HMDB00089 |
| dCDP                                        | HMDB01245 |
| Decanoyl-CoA (n-C10:0CoA)                   | HMDB06404 |
| Dehydroascorbic acid                        | HMDB01264 |
| Dehydroepiandrosterone                      | HMDB00077 |
| Deoxycholic acid                            | HMDB00626 |
| Deoxyuridine                                | HMDB00012 |
| Desmosterol                                 | HMDB02719 |
| D-Fructose                                  | HMDB00660 |
| DG(42:0)                                    | HMDB56063 |
| DG(42:6)                                    | HMDB07636 |
| Dodecanoic acid                             | HMDB00638 |
| Dodecanoylcarnitine                         | HMDB02250 |
| Eicosapentaenoic acid                       | HMDB01999 |
| Eicosenoic acid                             | HMDB02231 |
| Ethyl-3-Ureidopropionate                    | HMDB00026 |
| FAD                                         | HMDB01248 |
| Farnesol                                    | HMDB04305 |
| Fumaric acid                                | HMDB00134 |
| Gentisic acid                               | HMDB00152 |
| GlcCer(d18:0/14:0)                          | NA        |
| GlcCer(d18:0/18:0)                          | HMDB04972 |
| Gluconic acid                               | HMDB00625 |
| Gluconolactone                              | HMDB00150 |
| Glucosamine                                 | HMDB01514 |
| Glucose 1-phosphate                         | HMDB01586 |
| Glucosylceramide (d18:1/16:0)               | HMDB04971 |
| Glucosylceramide (d18:1/20:0)               | HMDB04973 |
| Glucuronic acid                             | HMDB00127 |
| Glutamate                                   | HMDB00148 |
| Glutamine                                   | HMDB00641 |
| Glutamine                                   | HMDB03423 |
| Glyceric acid                               | HMDB00139 |
| Glycocholic acid                            | HMDB00138 |
| Hexadecanedioic acid mono-L-carnitine ester | HMDB00712 |
| Hippuric acid                               | HMDB00714 |
| Histidine                                   | HMDB00177 |
| Homoserine                                  | HMDB00719 |
| Hydroxydodecanoic acid                      | HMDB02059 |

|                                |           |
|--------------------------------|-----------|
| Indoleacetic acid              | HMDB00197 |
| Indolepyruvate                 | HMDB60484 |
| Indoxyl sulfate                | HMDB00682 |
| Inosine diphosphate            | HMDB03335 |
| Isobutyryl-L-carnitine         | HMDB00736 |
| Isoleucine                     | HMDB00172 |
| Isopentenyl pyrophosphate      | HMDB01347 |
| Kojibiose                      | HMDB11742 |
| Kynurenine                     | HMDB00684 |
| L-Carnitine                    | HMDB00062 |
| Leucine                        | HMDB00687 |
| Leukotriene D4                 | HMDB03080 |
| Lithocholyltaurine             | HMDB00722 |
| LPA(18:0)                      | HMDB07850 |
| LPA(18:2)                      | HMDB07852 |
| LPC(16:0)                      | HMDB10382 |
| LPC(18:0)                      | HMDB13122 |
| LPC(18:1)                      | HMDB02815 |
| LPC(18:3)                      | HMDB10387 |
| LPC(24:1)                      | HMDB10406 |
| LPE(20:0)                      | HMDB12108 |
| LPE(22:0)                      | HMDB11490 |
| LPE(22:6)                      | HMDB11496 |
| Lysine                         | HMDB00182 |
| Malic acid                     | HMDB00744 |
| Malonyl-CoA                    | HMDB01175 |
| Malyl-CoA                      | HMDB01021 |
| Methionine                     | HMDB00696 |
| Methylglutaric acid            | HMDB00752 |
| MG(14:0/0:0/0:0)               | HMDB11561 |
| MG(18:1(9Z)/0:0/0:0)           | HMDB11567 |
| Myristic acid                  | HMDB00806 |
| N-Acetylaspartate              | HMDB00812 |
| N-Acetylglutamine              | HMDB06029 |
| N-Acetylneuraminic acid        | HMDB00230 |
| N-Acetylphenylalanine          | HMDB00512 |
| N-Acetylserotonin              | HMDB01238 |
| N-Acetyltryptophan             | HMDB13713 |
| N-Methyl-L-glutamate           | HMDB61715 |
| Nonanedioic acid               | HMDB00784 |
| Nonanoyl-CoA                   | HMDB13028 |
| Norvaline                      | HMDB13716 |
| Oleic acid                     | HMDB02080 |
| Ornithine                      | HMDB00214 |
| Ortho-Hydroxyphenylacetic acid | HMDB00669 |
| Oxalosuccinic acid             | HMDB03974 |
| Oxidized Glutathione           | HMDB03337 |
| Oxoadipic acid                 | HMDB00225 |

|                    |           |
|--------------------|-----------|
| Oxoglutaric acid   | HMDB00208 |
| PA 30:0            | HMDB00674 |
| PA(36:2)           | HMDB07862 |
| Palmitate          | HMDB00220 |
| Palmitic amide     | HMDB12273 |
| Palmitoleic acid   | HMDB03229 |
| Palmitoylcarnitine | HMDB00222 |
| Pantothenic acid   | HMDB00210 |
| PC(30:0)           | HMDB11203 |
| PC(32:0)           | HMDB07994 |
| PC(32:1)           | HMDB11302 |
| PC(34:0)           | HMDB07970 |
| PC(34:4)           | HMDB07883 |
| PC(36:5)           | HMDB11280 |
| PC(38:8)           | HMDB08502 |
| PC(40:6)           | HMDB08377 |
| PC(40:9)           | HMDB08509 |
| PE(36:0)           | HMDB08841 |
| PE(36:0)           | HMDB11373 |
| PE(36:1)           | HMDB09018 |
| PE(36:3)           | HMDB09548 |
| PE(36:5)           | HMDB09191 |
| PE(38:2)           | HMDB09288 |
| PE(38:4)           | HMDB09380 |
| PE(40:10)          | HMDB09467 |
| PE(40:5))          | HMDB11457 |
| PE(40:6)           | HMDB09396 |
| PE(42:10)          | HMDB09473 |
| PE(42:7)           | HMDB09595 |
| PG(34:1)           | HMDB10630 |
| PG(36:2)           | HMDB13418 |
| PG(36:3)           | HMDB10620 |
| PG(38:3)           | HMDB10608 |
| PG(38:4)           | HMDB10638 |
| PGP(38:7)          | HMDB13501 |
| Phenylalanine      | HMDB00159 |
| Phosphocreatine    | HMDB01511 |
| Phytonadione       | HMDB15157 |
| PI(38:2)           | HMDB09829 |
| PI(38:4)           | HMDB09830 |
| PI(38:6)           | HMDB09902 |
| PI(40:6)           | HMDB09892 |
| Pipecolic Acid     | HMDB00070 |
| Progesterone       | HMDB01830 |
| Proline            | HMDB00162 |
| Prostaglandin F1a  | HMDB02685 |
| Protoporphyrin IX  | HMDB00241 |
| PS(34:2)           | HMDB12358 |

|                            |           |
|----------------------------|-----------|
| PS(38:2)                   | NA        |
| PS(38:4)                   | NA        |
| PS(38:5)                   | HMDB12404 |
| PS(38:7)                   | HMDB12373 |
| PS(40:6)                   | NA        |
| PS(42:8)                   | HMDB12439 |
| PS(44:12)                  | HMDB12450 |
| Pyridoxamine               | HMDB01431 |
| Pyroglutamic acid          | HMDB00267 |
| Pyrrolidonecarboxylic acid | HMDB00805 |
| Retinoate                  | HMDB02369 |
| Riboflavin                 | HMDB00244 |
| SM(d16:0/20:0)             | NA        |
| SM(d18:0/18:1(9Z))         | HMDB12089 |
| SM(d18:0/22:0)             | HMDB12091 |
| SM(d18:0/24:0)             | HMDB12094 |
| SM(d18:0/24:1(15Z))        | HMDB12095 |
| SM(d18:1/20:0)             | HMDB13468 |
| SM(d18:1/23:0)             | HMDB12105 |
| SODIUM BENZOATE            | HMDB01870 |
| Sphinganine                | HMDB00269 |
| Sphingosine-1-phosphate    | HMDB00277 |
| Suberic acid               | HMDB00893 |
| Succinate                  | HMDB00254 |
| Sucrose                    | HMDB00258 |
| Tartaric acid              | HMDB00956 |
| Taurine                    | HMDB00251 |
| Taurodeoxycholic acid      | HMDB00896 |
| Tetradecanedioic acid      | HMDB00872 |
| Tetradecanoylcarnitine     | HMDB05066 |
| TG(38:0)                   | NA        |
| TG(40:1)                   | HMDB07553 |
| TG(44:3)                   | NA        |
| TG(52:1)                   | HMDB46308 |
| TG(56:7)                   | HMDB10521 |
| TG(58:10)                  | HMDB48227 |
| TG(58:5)                   | HMDB05408 |
| TG(58:6)                   | HMDB52466 |
| TG(60:5)                   | HMDB54421 |
| TG(64:16)                  | HMDB10553 |
| Thymidine                  | HMDB00273 |
| Thymine                    | HMDB00262 |
| Thyroxine                  | HMDB00248 |
| trans-Aconitic acid        | HMDB00958 |
| Tryptophan                 | HMDB00929 |
| Tyrosine                   | HMDB00158 |
| Uric acid                  | HMDB00289 |
| Uridine                    | HMDB00296 |

|                                         |           |
|-----------------------------------------|-----------|
| Uridine 5'-monophosphate                | HMDB00288 |
| Uridine diphosphate-N-acetylglucosamine | HMDB00290 |
| Xanthosine                              | HMDB00299 |
| $\gamma$ -D-Glutamylglycine             | HMDB11667 |

| <b>KEGG ID</b> | <b>database used</b>    | <b>m/z</b> | <b>accurate mass</b> |
|----------------|-------------------------|------------|----------------------|
| C03221         | Metlin, HMDB            | 944.24     | 944.24               |
| C05276         | Metlin, HMDB            | 892.22     | 892.21               |
| C05262         | Metlin, HMDB            | 966.30     | 966.28               |
| C05488         | Metlin, HMDB            | 345.21     | 345.21               |
| NA             | Metlin, HMDB            | 297.24     | 297.24               |
| C14775         | Metlin, HMDB            | 337.24     | 337.24               |
| C01124         | Metlin, HMDB            | 363.22     | 363.22               |
| C01885         | Metlin, HMDB            | 331.28     | 331.28               |
| C02990         | Metlin, HMDB            | 302.23     | 302.23               |
| C06340         | Metlin, HMDB, LipidMaps | 431.38     | 431.38               |
| C05984         | HMDB                    | 103.04     | 103.04               |
| C03672         | Metlin, HMDB            | 181.05     | 181.05               |
| C01367         | Metlin, HMDB            | 348.07     | 348.07               |
| NA             | Metlin, HMDB            | 187.14     | 187.13               |
| NA             | Metlin, HMDB            | 386.27     | 386.27               |
| C03761         | Metlin, HMDB            | 161.05     | 161.05               |
| NA             | HMDB                    | 290.15     | 290.15               |
| C01152         | Metlin, HMDB            | 170.09     | 170.09               |
| C05263         | Metlin, HMDB            | 964.24     | 964.26               |
| NA             | HMDB                    | 427.36     | 427.35               |
| C00633         | Metlin, HMDB            | 121.03     | 121.03               |
| C01157         | Metlin, HMDB            | 132.06     | 132.07               |
| C04352         | Metlin, HMDB            | 403.09     | 403.09               |
| C01181         | Metlin, HMDB            | 146.12     | 146.12               |
| C14772         | Metlin, HMDB            | 339.25     | 339.25               |
| C00431         | Metlin, HMDB            | 118.09     | 118.09               |
| C01017         | Metlin, HMDB            | 219.08     | 219.08               |
| C14732         | Metlin, HMDB            | 319.23     | 319.23               |
| NA             | HMDB                    | 153.04     | 153.03               |
| C03299         | HMDB                    | 396.30     | 396.30               |
| C01530         | HMDB                    | 281.25     | 281.25               |
| NA             | Metlin, HMDB            | 319.23     | 319.23               |
| NA             | Metlin, HMDB            | 297.24     | 297.24               |
| C00894         | HMDB                    | 822.10     | 822.13               |
| C00301         | Metlin, HMDB            | 558.07     | 558.07               |
| C00054         | Metlin, HMDB            | 426.02     | 426.02               |
| C00008         | Metlin, HMDB            | 428.03     | 428.02               |
| C01551         | Metlin, HMDB            | 157.04     | 157.04               |
| NA             | Metlin, HMDB            | 393.30     | 393.30               |
| C06427         | Metlin, HMDB            | 279.23     | 279.23               |
| C00956         | Metlin, HMDB            | 160.06     | 160.06               |
| C00219         | Metlin, HMDB, LipidMaps | 305.25     | 305.25               |
| C00062         | Metlin, HMDB            | 175.12     | 175.12               |
| C03626         | Metlin, HMDB            | 203.15     | 203.15               |
| C00500         | Metlin, HMDB            | 583.25     | 583.26               |
| C00120         | Metlin, HMDB            | 245.10     | 245.10               |
| C02530         | Metlin, HMDB            | 569.53     | 569.53               |

|        |                         |        |        |
|--------|-------------------------|--------|--------|
| C00195 | Metlin                  | 636.61 | 636.59 |
| C00195 | Metlin, HMDB            | 638.65 | 638.64 |
| NA     | Metlin, HMDB            | 472.34 | 472.34 |
| C02528 | Metlin, HMDB            | 393.30 | 393.30 |
| C00187 | HMDB                    | 369.35 | 369.34 |
| C00158 | Metlin, HMDB            | 193.03 | 193.03 |
| C00327 | Metlin, HMDB            | 174.09 | 174.09 |
| C00300 | Metlin, HMDB            | 132.08 | 132.08 |
| C00791 | Metlin, HMDB            | 114.07 | 114.07 |
| C00475 | Metlin, HMDB            | 242.08 | 242.09 |
| C00705 | HMDB                    | 386.03 | 386.02 |
| C05274 | Metlin, HMDB            | 922.27 | 922.26 |
| C00425 | Metlin, HMDB            | 173.01 | 173.01 |
| C01227 | Metlin, HMDB            | 289.22 | 289.22 |
| C04483 | Metlin, HMDB            | 391.29 | 391.29 |
| C00526 | Metlin, HMDB            | 227.07 | 227.07 |
| C01802 | Metlin, HMDB            | 385.35 | 385.35 |
| C02336 | Metlin, HMDB            | 179.06 | 179.06 |
| C00165 | Metlin, HMDB, LipidMaps | 709.66 | 709.67 |
| C00165 | Metlin, HMDB, LipidMaps | 695.57 | 695.56 |
| C02679 | Metlin, HMDB            | 199.17 | 199.17 |
| C03299 | Metlin, HMDB            | 344.28 | 344.28 |
| C06428 | Metlin, HMDB            | 303.22 | 303.22 |
| C16526 | Metlin, HMDB            | 309.28 | 309.28 |
| C0264  | Metlin                  | 161.09 | 161.09 |
| C00016 | Metlin, HMDB            | 784.15 | 784.15 |
| C01126 | Metlin, HMDB            | 223.20 | 223.21 |
| C00122 | Metlin, HMDB            | 115.00 | 115.00 |
| C00628 | Metlin, HMDB            | 155.04 | 155.03 |
| C01190 | Metlin                  | 672.55 | 672.54 |
| C01190 | Metlin, HMDB, LipidMaps | 730.62 | 730.62 |
| C00257 | Metlin, HMDB            | 195.05 | 195.05 |
| C00198 | Metlin, HMDB            | 179.05 | 179.06 |
| C00329 | Metlin, HMDB            | 180.09 | 180.09 |
| C00103 | Metlin, HMDB            | 261.04 | 261.04 |
| C01190 | Metlin, HMDB            | 698.56 | 698.56 |
| C01190 | Metlin, HMDB            | 754.64 | 754.62 |
| C00191 | Metlin, HMDB            | 193.04 | 193.04 |
| C00025 | Metlin, HMDB            | 148.06 | 148.06 |
| C00064 | Metlin, HMDB            | 145.06 | 145.06 |
| C00819 | Metlin, HMDB            | 147.08 | 147.08 |
| C00258 | Metlin, HMDB            | 105.02 | 105.02 |
| C01921 | Metlin, HMDB            | 464.31 | 464.30 |
| C02990 | Metlin, HMDB            | 430.32 | 430.32 |
| C01586 | Metlin, HMDB            | 180.07 | 180.07 |
| C00135 | Metlin, HMDB            | 154.06 | 154.06 |
| C00263 | Metlin, HMDB            | 120.06 | 120.07 |
| C08317 | Metlin, HMDB            | 215.17 | 215.17 |



|        |                         |        |        |
|--------|-------------------------|--------|--------|
| C00954 | Metlin, HMDB            | 176.07 | 176.07 |
| C00331 | Metlin, HMDB            | 202.05 | 202.05 |
| NA     | Metlin, HMDB            | 134.06 | 134.06 |
| C00104 | Metlin, HMDB            | 427.01 | 427.01 |
| NA     | Metlin, HMDB            | 232.15 | 232.15 |
| C00407 | Metlin, HMDB            | 130.09 | 130.09 |
| C00129 | HMDB                    | 298.08 | 298.09 |
| C19632 | Metlin, HMDB            | 343.12 | 343.12 |
| C00328 | Metlin, HMDB            | 209.09 | 209.09 |
| C00318 | Metlin, HMDB            | 162.11 | 162.11 |
| C00123 | Metlin, HMDB            | 132.10 | 132.10 |
| C05951 | Metlin, HMDB            | 497.26 | 497.26 |
| C02592 | Metlin, HMDB            | 482.29 | 482.29 |
| C00416 | Metlin, HMDB, LipidMaps | 461.25 | 461.26 |
| C00416 | Metlin, HMDB, LipidMaps | 435.24 | 435.24 |
| C04230 | Metlin, HMDB            | 496.34 | 496.34 |
| C04230 | Metlin, HMDB            | 508.37 | 508.38 |
| C04230 | Metlin, HMDB, LipidMaps | 522.35 | 522.36 |
| C04230 | Metlin, HMDB            | 518.32 | 518.32 |
| C04230 | Metlin, HMDB            | 606.45 | 606.45 |
| C04230 | Metlin, HMDB            | 510.35 | 510.36 |
| NA     | Metlin, HMDB            | 538.39 | 538.39 |
| C05973 | Metlin, HMDB            | 526.29 | 526.29 |
| C00047 | Metlin, HMDB            | 147.11 | 147.11 |
| C00711 | Metlin, HMDB            | 133.02 | 133.01 |
| C00083 | Metlin, HMDB            | 854.10 | 854.12 |
| C04348 | Metlin, HMDB            | 884.15 | 884.13 |
| C00073 | Metlin, HMDB            | 150.06 | 150.06 |
| C03761 | Metlin, HMDB            | 147.06 | 147.07 |
| C01885 | Metlin, HMDB            | 303.25 | 303.25 |
| C01885 | Metlin, HMDB            | 357.30 | 357.29 |
| C06424 | Metlin, HMDB            | 227.20 | 227.20 |
| C01042 | Metlin, HMDB            | 174.04 | 174.04 |
| C04148 | Metlin, HMDB            | 187.07 | 187.08 |
| C19910 | Metlin, HMDB            | 308.10 | 308.10 |
| C03519 | Metlin, HMDB            | 206.08 | 206.08 |
| C00978 | Metlin, HMDB            | 217.11 | 217.11 |
| NA     | Metlin, HMDB            | 245.09 | 245.09 |
| C01046 | Metlin, HMDB            | 162.08 | 162.08 |
| C08261 | Metlin, HMDB            | 187.10 | 187.10 |
| C01942 | Metlin, HMDB            | 908.24 | 908.24 |
| C01826 | Metlin, HMDB            | 118.09 | 118.09 |
| C08363 | Metlin, HMDB            | 283.26 | 283.26 |
| C00077 | Metlin, HMDB            | 131.08 | 131.08 |
| C05852 | Metlin, HMDB            | 151.04 | 151.04 |
| C05379 | Metlin, HMDB            | 189.02 | 189.01 |
| C00127 | Metlin, HMDB            | 613.16 | 613.16 |
| C00322 | Metlin, HMDB            | 159.03 | 159.03 |

|        |                         |        |        |
|--------|-------------------------|--------|--------|
| C00026 | Metlin, HMDB            | 145.01 | 145.01 |
| C00416 | Metlin, HMDB            | 621.43 | 621.45 |
| C00416 | Metlin, HMDB            | 701.49 | 701.51 |
| C00249 | Metlin, HMDB            | 255.23 | 255.23 |
| C00249 | Metlin, HMDB            | 256.26 | 256.26 |
| C08362 | Metlin, HMDB            | 255.23 | 255.23 |
| C02990 | Metlin, HMDB            | 400.34 | 400.34 |
| C00864 | Metlin, HMDB            | 218.10 | 218.10 |
| C00350 | Metlin, HMDB, LipidMaps | 688.53 | 688.53 |
| C00157 | HMDB, LipidMaps         | 732.59 | 732.57 |
| C00350 | HMDB, LipidMaps         | 714.53 | 714.54 |
| C00157 | Metlin, HMDB, LipidMaps | 762.61 | 762.60 |
| C00157 | Metlin, HMDB, LipidMaps | 752.53 | 752.52 |
| C00157 | Metlin, HMDB, LipidMaps | 762.56 | 762.54 |
| C00157 | HMDB, LipidMaps         | 800.53 | 800.53 |
| C00157 | HMDB, LipidMaps         | 834.58 | 834.59 |
| C00157 | Metlin, HMDB, LipidMaps | 862.52 | 862.52 |
| C00350 | Metlin, HMDB, LipidMaps | 746.57 | 746.57 |
| C00350 | Metlin, HMDB, LipidMaps | 766.56 | 766.55 |
| C00350 | Metlin, HMDB, LipidMaps | 728.56 | 728.56 |
| C00350 | Metlin, HMDB, LipidMaps | 742.54 | 742.54 |
| C00350 | Metlin, HMDB, LipidMaps | 772.48 | 772.47 |
| C00350 | Metlin, HMDB, LipidMaps | 758.61 | 758.61 |
| C00350 | Metlin, HMDB, LipidMaps | 752.57 | 752.56 |
| C00350 | Metlin, HMDB            | 782.48 | 782.48 |
| C00350 | Metlin, HMDB, LipidMaps | 778.58 | 778.57 |
| C00350 | Metlin, HMDB, LipidMaps | 814.53 | 814.54 |
| C00350 | Metlin, HMDB, LipidMaps | 812.53 | 812.52 |
| C00350 | Metlin, HMDB            | 818.57 | 818.57 |
| C00344 | Metlin, HMDB            | 749.53 | 749.53 |
| C00344 | Metlin, HMDB            | 795.53 | 795.53 |
| C00344 | Metlin, HMDB            | 773.55 | 773.53 |
| C00344 | Metlin, HMDB            | 801.56 | 801.56 |
| C00344 | Metlin, HMDB            | 799.54 | 799.55 |
| C00344 | HMDB                    | 871.44 | 871.46 |
| C00079 | Metlin, HMDB            | 166.09 | 166.09 |
| C02305 | Metlin, HMDB            | 212.05 | 212.04 |
| C02059 | Metlin, HMDB            | 451.36 | 451.36 |
| C00626 | HMDB                    | 889.57 | 889.59 |
| C00626 | HMDB                    | 885.55 | 885.56 |
| C00626 | Metlin, HMDB, LipidMaps | 881.52 | 881.52 |
| C00626 | Metlin, HMDB, LipidMaps | 909.56 | 909.55 |
| C00408 | Metlin, HMDB, LipidMaps | 130.09 | 130.09 |
| C00410 | Metlin, HMDB, LipidMaps | 315.23 | 315.23 |
| C00148 | Metlin, HMDB            | 116.07 | 116.07 |
| C06475 | Metlin, HMDB            | 379.25 | 379.25 |
| C02191 | Metlin, HMDB            | 563.26 | 563.27 |
| C02737 | Metlin, HMDB, LipidMaps | 758.51 | 758.50 |

|        |                         |        |        |
|--------|-------------------------|--------|--------|
| C02737 | Metlin, HMDB, LipidMaps | 816.57 | 816.57 |
| C02737 | Metlin, HMDB, LipidMaps | 830.51 | 830.51 |
| C02737 | Metlin, HMDB, LipidMaps | 810.53 | 810.53 |
| C02737 | Metlin, HMDB            | 806.48 | 806.50 |
| C02737 | Metlin, LipidMaps       | 820.56 | 820.55 |
| C02737 | Metlin, HMDB, LipidMaps | 878.52 | 878.49 |
| C02737 | Metlin, HMDB, LipidMaps | 880.52 | 880.51 |
| C00534 | Metlin, HMDB            | 169.09 | 169.09 |
| C01879 | Metlin, HMDB            | 128.04 | 128.04 |
| C02237 | Metlin, HMDB            | 130.05 | 130.05 |
| C15493 | Metlin, HMDB            | 301.21 | 301.22 |
| C00255 | Metlin, HMDB            | 375.13 | 375.13 |
| C00550 | Metlin, LipidMaps       | 755.60 | 755.60 |
| C00550 | Metlin, HMDB, LipidMaps | 731.61 | 731.61 |
| C00550 | Metlin, HMDB, LipidMaps | 789.68 | 789.68 |
| C00550 | Metlin, HMDB, LipidMaps | 817.71 | 817.72 |
| C00550 | Metlin, HMDB, LipidMaps | 815.70 | 815.70 |
| C00550 | Metlin, HMDB            | 781.62 | 781.62 |
| C00550 | Metlin, HMDB            | 823.67 | 823.67 |
| C00180 | Metlin, HMDB            | 121.03 | 121.03 |
| C00836 | Metlin, HMDB            | 302.31 | 302.31 |
| C06124 | Metlin, HMDB            | 380.26 | 380.26 |
| C08278 | Metlin, HMDB            | 173.08 | 173.08 |
| C00042 | Metlin, HMDB            | 117.02 | 117.02 |
| C00089 | Metlin, HMDB            | 341.11 | 341.11 |
| C00898 | Metlin, HMDB            | 149.01 | 149.01 |
| C00245 | Metlin, HMDB            | 126.02 | 126.02 |
| C05463 | Metlin, HMDB            | 500.30 | 500.30 |
| C11002 | Metlin, HMDB            | 257.18 | 257.18 |
| NA     | Metlin, HMDB            | 372.31 | 372.31 |
| C00422 | Metlin                  | 695.61 | 695.62 |
| C00165 | Metlin, LipidMaps       | 693.61 | 693.60 |
| C00165 | Metlin, LipidMaps       | 779.60 | 779.60 |
| C00422 | Metlin, HMDB            | 859.77 | 859.77 |
| C00422 | HMDB                    | 903.77 | 903.75 |
| C00422 | Metlin, HMDB            | 925.74 | 925.73 |
| C00422 | Metlin, HMDB            | 935.79 | 935.81 |
| C00422 | Metlin, HMDB            | 935.81 | 935.81 |
| C00422 | Metlin, HMDB            | 963.83 | 963.84 |
| C00422 | Metlin, HMDB            | 997.71 | 997.73 |
| C00214 | Metlin, HMDB            | 241.08 | 241.08 |
| C00178 | Metlin, HMDB            | 127.05 | 127.05 |
| C01829 | HMDB                    | 775.68 | 775.69 |
| C02341 | Metlin, HMDB            | 175.02 | 175.02 |
| C00078 | Metlin, HMDB            | 205.10 | 205.10 |
| C00082 | Metlin, HMDB            | 182.08 | 182.08 |
| C00366 | Metlin, HMDB            | 169.03 | 169.04 |
| C00299 | Metlin, HMDB            | 243.06 | 243.06 |

|        |              |        |        |
|--------|--------------|--------|--------|
| C00105 | HMDB         | 323.03 | 323.03 |
| C00043 | HMDB         | 606.08 | 606.08 |
| C01762 | Metlin, HMDB | 283.07 | 283.07 |
| C03740 | Metlin, HMDB | 205.08 | 205.08 |

| <b>Δ mass</b> | <b>RT (min)</b> | <b>Standard RT (min)</b> | <b>Δ RT (min)</b> | <b>B10</b> | <b>B12</b> |
|---------------|-----------------|--------------------------|-------------------|------------|------------|
| 0.0041        | 26.82           | NA                       | NA                | 1309       | 1040       |
| 0.0117        | 26.77           | NA                       | NA                | 3433       | 3078       |
| 0.0169        | 26.89           | NA                       | NA                | 625        | 749        |
| 0.0052        | 24.30           | 23.98                    | 0.32              | 244140     | 266640     |
| 0.0048        | 24.89           | NA                       | NA                | 21484      | 22788      |
| 0.0007        | 26.19           | NA                       | NA                | 1618       | 947        |
| 0.0013        | 23.52           | NA                       | NA                | 17642      | 18574      |
| 0.0050        | 25.36           | 25.70                    | 0.34              | 16482      | 17532      |
| 0.0011        | 23.96           | 23.41                    | 0.55              | 11237      | 10361      |
| 0.0001        | 26.99           | NA                       | NA                | 161922     | 228196     |
| 0.0003        | 8.04            | 8.07                     | 0.03              | 665172     | 959575     |
| 0.0010        | 12.32           | 12.50                    | 0.18              | 59744      | 38945      |
| 0.0024        | 5.38            | NA                       | NA                | 7180       | 4805       |
| 0.0017        | 22.51           | 21.78                    | 0.73              | 35415      | 67058      |
| 0.0005        | 25.32           | NA                       | NA                | 13185      | 17401      |
| 0.0010        | 6.62            | NA                       | NA                | 1523       | 3811       |
| 0.0027        | 26.33           | NA                       | NA                | 25859      | 29651      |
| 0.0005        | 4.82            | 4.89                     | 0.07              | 109414     | 150925     |
| 0.0181        | 27.04           | NA                       | NA                | 3622       | 3036       |
| 0.0101        | 26.88           | NA                       | NA                | 5033       | 4696       |
| 0.0013        | 17.11           | 17.30                    | 0.19              | 16847      | 20555      |
| 0.0010        | 4.73            | 4.70                     | 0.03              | 7728       | 9794       |
| 0.0020        | 21.87           | NA                       | NA                | 100513     | 94580      |
| 0.0020        | 6.44            | 6.21                     | 0.23              | 29169      | 32130      |
| 0.0011        | 25.33           | NA                       | NA                | 8088       | 8185       |
| 0.0011        | 5.38            | 5.32                     | 0.06              | 149177     | 107380     |
| 0.0005        | 8.88            | NA                       | NA                | 25127      | 18929      |
| 0.0006        | 24.74           | NA                       | NA                | 113563     | 117983     |
| 0.0037        | 20.63           | NA                       | NA                | 165995     | 132337     |
| 0.0007        | 24.05           | 24.25                    | 0.20              | 23152      | 25572      |
| 0.0017        | 25.98           | NA                       | NA                | 165812     | 384138     |
| 0.0008        | 25.26           | NA                       | NA                | 174527     | 328092     |
| 0.0048        | 25.39           | NA                       | NA                | 46957      | 51733      |
| 0.0230        | 6.37            | NA                       | NA                | 91         | 19         |
| 0.0021        | 4.76            | 4.87                     | 0.11              | 2558       | 2134       |
| 0.0036        | 4.79            | 4.75                     | 0.04              | 6470       | 14544      |
| 0.0098        | 4.82            | 4.75                     | 0.07              | 2046       | 6774       |
| 0.0011        | 5.01            | 5.03                     | 0.02              | 44758      | 35155      |
| 0.0018        | 24.53           | 25.40                    | 0.87              | 6483       | 8232       |
| 0.0009        | 25.83           | NA                       | NA                | 47567      | 66521      |
| 0.0018        | 4.90            | 4.89                     | 0.01              | 24133      | 20510      |
| 0.0005        | 26.10           | NA                       | NA                | 131513     | 162801     |
| 0.0010        | 4.52            | 4.33                     | 0.19              | 72103      | 56239      |
| 0.0012        | 5.38            | 5.35                     | 0.03              | 15680      | 15413      |
| 0.0018        | 25.02           | 25.18                    | 0.16              | 51906      | 128109     |
| 0.0026        | 18.69           | 19.12                    | 0.43              | 23300      | 20940      |
| 0.0003        | 26.71           | NA                       | NA                | 14573      | 14945      |

|        |       |       |      |          |        |
|--------|-------|-------|------|----------|--------|
| 0.0133 | 4.42  | NA    | NA   | 26248    | 23870  |
| 0.0088 | 4.39  | NA    | NA   | 24924    | 21496  |
| 0.0055 | 25.59 | NA    | NA   | 34664    | 31360  |
| 0.0010 | 25.62 | 25.30 | 0.32 | 28789    | 26362  |
| 0.0074 | 27.42 | 27.15 | 0.27 | 70542    | 74839  |
| 0.0002 | 5.60  | 5.38  | 0.22 | 17732    | 26762  |
| 0.0011 | 4.76  | 4.79  | 0.03 | 81463    | 68279  |
| 0.0008 | 5.34  | 5.33  | 0.01 | 323567.5 | 223031 |
| 0.0003 | 5.42  | 5.96  | 0.54 | 40804    | 21445  |
| 0.0030 | 5.39  | 5.31  | 0.08 | 31376    | 226379 |
| 0.0110 | 4.93  | 5.22  | 0.29 | 8233     | 17527  |
| 0.0111 | 27.51 | NA    | NA   | 2278     | 3039   |
| 0.0012 | 6.33  | 5.34  | 0.99 | 85793    | 124832 |
| 0.0002 | 24.84 | NA    | NA   | 36446    | 33367  |
| 0.0001 | 25.33 | 25.40 | 0.07 | 87461    | 60111  |
| 0.0016 | 7.83  | NA    | NA   | 104993   | 135840 |
| 0.0007 | 26.74 | 26.21 | 0.53 | 4074     | 5748   |
| 0.0018 | 4.94  | 4.67  | 0.27 | 450676   | 450408 |
| 0.0126 | 4.38  | NA    | NA   | 6472     | 5698   |
| 0.0041 | 4.40  | NA    | NA   | 3791     | 3867   |
| 0.0018 | 24.74 | 24.80 | 0.06 | 7285     | 7309   |
| 0.0012 | 23.22 | 23.10 | 0.12 | 10324    | 16957  |
| 0.0060 | 25.24 | NA    | NA   | 125622   | 237214 |
| 0.0030 | 26.29 | NA    | NA   | 3946     | 7664   |
| 0.0022 | 24.75 | 24.84 | 0.09 | 9903     | 8303   |
| 0.0016 | 16.32 | 16.65 | 0.33 | 23873    | 41255  |
| 0.0009 | 25.31 | NA    | NA   | 4019     | 4835   |
| 0.0011 | 5.78  | 6.57  | 0.79 | 33225    | 29868  |
| 0.0019 | 16.22 | NA    | NA   | 89897    | 88513  |
| 0.0114 | 4.42  | NA    | NA   | 1807     | 2283   |
| 0.0019 | 4.36  | NA    | NA   | 369      | 386    |
| 0.0012 | 4.71  | 4.68  | 0.03 | 34808    | 376550 |
| 0.0012 | 4.69  | 4.80  | 0.11 | 564      | 4557   |
| 0.0008 | 4.92  | 4.43  | 0.49 | 79965    | 99982  |
| 0.0008 | 4.70  | 4.31  | 0.39 | 23632    | 42364  |
| 0.0070 | 4.41  | NA    | NA   | 18907    | 18091  |
| 0.0149 | 4.34  | NA    | NA   | 1640     | 1241.5 |
| 0.0004 | 4.62  | NA    | NA   | 6713     | 9308   |
| 0.0014 | 4.68  | 4.62  | 0.06 | 19604    | 46457  |
| 0.0013 | 4.59  | 4.49  | 0.10 | 203109   | 207455 |
| 0.0010 | 4.64  | 4.63  | 0.01 | 713792   | 852369 |
| 0.0026 | 5.05  | 5.06  | 0.01 | 9986     | 9384.5 |
| 0.0032 | 24.08 | 24.10 | 0.02 | 954      | 1879   |
| 0.0018 | 24.81 | NA    | NA   | 18473    | 18638  |
| 0.0004 | 17.22 | 17.44 | 0.22 | 474302.5 | 809752 |
| 0.0009 | 4.48  | 4.24  | 0.24 | 7343     | 8948   |
| 0.0009 | 4.65  | 4.45  | 0.20 | 50420    | 48708  |
| 0.0011 | 23.64 | NA    | NA   | 25442    | 36477  |

|        |       |       |      |          |          |
|--------|-------|-------|------|----------|----------|
| 0.0004 | 20.01 | NA    | NA   | 10441    | 15897    |
| 0.0017 | 21.06 | 20.80 | 0.26 | 6326     | 3924     |
| 0.0005 | 12.35 | 12.96 | 0.61 | 18529    | 18507    |
| 0.0001 | 5.59  | 6.54  | 0.95 | 1321     | 2907     |
| 0.0002 | 13.75 | NA    | NA   | 221553   | 264512   |
| 0.0023 | 6.35  | 6.90  | 0.55 | 69382    | 50901    |
| 0.0023 | 23.75 | 23.80 | 0.05 | 31403    | 33352    |
| 0.0004 | 4.71  | NA    | NA   | 26854    | 34782    |
| 0.0001 | 12.05 | 12.08 | 0.03 | 30437    | 28024    |
| 0.0017 | 5.47  | 5.72  | 0.25 | 1506130  | 1006476  |
| 0.0001 | 6.55  | 6.90  | 0.35 | 412643   | 323816   |
| 0.0015 | 25.71 | 25.00 | 0.71 | 477473   | 538061   |
| 0.0016 | 24.42 | 24.50 | 0.08 | 1615     | 1980     |
| 0.0122 | 24.61 | NA    | NA   | 16013    | 17053    |
| 0.0057 | 24.17 | NA    | NA   | 36655    | 42208    |
| 0.0023 | 27.60 | NA    | NA   | 32028158 | 39862619 |
| 0.0017 | 26.55 | NA    | NA   | 189239   | 249706   |
| 0.0018 | 26.22 | NA    | NA   | 11913729 | 12802685 |
| 0.0000 | 26.09 | NA    | NA   | 2392823  | 2941881  |
| 0.0025 | 27.70 | NA    | NA   | 56929    | 55771    |
| 0.0027 | 26.08 | NA    | NA   | 592263   | 781236   |
| 0.0043 | 26.60 | NA    | NA   | 234815   | 314588   |
| 0.0017 | 25.40 | NA    | NA   | 3133990  | 3923546  |
| 0.0010 | 4.17  | 3.98  | 0.19 | 76115    | 79790    |
| 0.0024 | 5.40  | 5.26  | 0.14 | 30130    | 100554   |
| 0.0122 | 21.08 | NA    | NA   | 32141    | 19397    |
| 0.0161 | 26.21 | NA    | NA   | 875      | 1115     |
| 0.0004 | 6.04  | 6.08  | 0.04 | 328008   | 338175   |
| 0.0025 | 12.03 | 12.18 | 0.15 | 69065    | 64546    |
| 0.0034 | 24.98 | NA    | NA   | 6916     | 7847     |
| 0.0072 | 25.63 | NA    | NA   | 154135   | 98411    |
| 0.0008 | 25.24 | 25.30 | 0.06 | 6752     | 10442    |
| 0.0008 | 6.34  | 6.50  | 0.16 | 21570    | 56597    |
| 0.0052 | 6.42  | NA    | NA   | 1108     | 1098     |
| 0.0012 | 4.90  | 4.88  | 0.02 | 11489    | 8131     |
| 0.0012 | 19.39 | 19.51 | 0.12 | 23572    | 38449    |
| 0.0046 | 18.77 | 18.44 | 0.33 | 2157     | 3704     |
| 0.0012 | 19.74 | 19.47 | 0.27 | 38449    | 46517    |
| 0.0009 | 4.89  | NA    | NA   | 39436    | 55695    |
| 0.0017 | 20.50 | 20.60 | 0.10 | 135470   | 169113   |
| 0.0005 | 27.26 | NA    | NA   | 17631    | 17661    |
| 0.0001 | 6.37  | 5.78  | 0.59 | 826526   | 799428   |
| 0.0011 | 25.99 | 25.70 | 0.29 | 18884    | 39825    |
| 0.0020 | 4.78  | 4.11  | 0.67 | 54395    | 45241    |
| 0.0015 | 17.51 | 16.90 | 0.61 | 10019    | 6370     |
| 0.0055 | 20.30 | NA    | NA   | 3853     | 4526     |
| 0.0008 | 5.37  | 6.01  | 0.64 | 7966     | 11947    |
| 0.0008 | 6.29  | 6.62  | 0.33 | 15574    | 20971    |

|        |       |       |      |         |         |
|--------|-------|-------|------|---------|---------|
| 0.0005 | 5.42  | NA    | NA   | 13471   | 31143   |
| 0.0147 | 26.54 | NA    | NA   | 8326    | 7313    |
| 0.0169 | 23.01 | NA    | NA   | 10570   | 7028    |
| 0.0002 | 25.74 | 25.80 | 0.06 | 81196   | 149609  |
| 0.0003 | 25.39 | 25.80 | 0.41 | 101469  | 102951  |
| 0.0000 | 25.59 | 25.70 | 0.11 | 29685   | 53719   |
| 0.0004 | 24.37 | 24.25 | 0.12 | 245122  | 370547  |
| 0.0006 | 10.71 | 10.74 | 0.03 | 520282  | 457439  |
| 0.0051 | 4.41  | NA    | NA   | 23018   | 24084   |
| 0.0205 | 4.45  | 5.38  | 0.93 | 22473   | 19703   |
| 0.0110 | 4.45  | 4.87  | 0.42 | 6356    | 6650    |
| 0.0060 | 4.41  | NA    | NA   | 44250   | 35417   |
| 0.0028 | 4.38  | 4.87  | 0.49 | 7917    | 7523    |
| 0.0113 | 4.41  | 4.91  | 0.50 | 8285    | 7687    |
| 0.0012 | 4.42  | NA    | NA   | 2264    | 1398    |
| 0.0114 | 4.40  | 5.38  | 0.98 | 20505   | 16612   |
| 0.0036 | 4.35  | NA    | NA   | 2975    | 1452    |
| 0.0035 | 4.35  | 4.97  | 0.62 | 4520    | 3109    |
| 0.0041 | 4.39  | NA    | NA   | 8391    | 8658    |
| 0.0038 | 4.35  | NA    | NA   | 2449    | 2310    |
| 0.0029 | 4.44  | 4.99  | 0.55 | 13928   | 14158   |
| 0.0106 | 4.42  | 5.01  | 0.59 | 2884    | 2693    |
| 0.0002 | 4.40  | 5.29  | 0.89 | 38068   | 34901   |
| 0.0151 | 4.42  | NA    | NA   | 31130   | 26504   |
| 0.0054 | 4.39  | NA    | NA   | 3340    | 3802    |
| 0.0037 | 4.40  | NA    | NA   | 9902    | 10012   |
| 0.0058 | 4.39  | NA    | NA   | 23180   | 20987   |
| 0.0049 | 4.40  | NA    | NA   | 35382   | 27279   |
| 0.0035 | 4.38  | NA    | NA   | 41344   | 31952   |
| 0.0042 | 27.40 | NA    | NA   | 159599  | 166041  |
| 0.0012 | 4.42  | NA    | NA   | 1971    | 1741    |
| 0.0124 | 28.26 | NA    | NA   | 19948   | 20238   |
| 0.0077 | 28.63 | NA    | NA   | 40325   | 44317   |
| 0.0110 | 27.57 | NA    | NA   | 15442   | 13788   |
| 0.0211 | 4.40  | NA    | NA   | 617     | 676     |
| 0.0011 | 9.68  | 9.68  | 0.00 | 3724247 | 5874978 |
| 0.0027 | 4.95  | 4.96  | 0.01 | 2937    | 4786    |
| 0.0005 | 27.30 | 28.08 | 0.78 | 20086   | 20749   |
| 0.0177 | 25.75 | NA    | NA   | 39794   | 40255   |
| 0.0061 | 23.99 | NA    | NA   | 789714  | 1300784 |
| 0.0038 | 36.06 | NA    | NA   | 11812   | 4240    |
| 0.0086 | 38.89 | NA    | NA   | 11136   | 6817    |
| 0.0012 | 6.36  | 7.04  | 0.68 | 79857   | 82652   |
| 0.0024 | 25.72 | 25.92 | 0.20 | 4403    | 4383    |
| 0.0013 | 5.37  | 5.57  | 0.20 | 130068  | 134740  |
| 0.0000 | 24.19 | NA    | NA   | 20108   | 20042   |
| 0.0008 | 27.59 | 27.80 | 0.21 | 891     | 5852    |
| 0.0131 | 4.39  | NA    | NA   | 9728    | 11251   |



|        |       |       |      |         |         |
|--------|-------|-------|------|---------|---------|
| 0.0057 | 4.37  | NA    | NA   | 25049   | 23398   |
| 0.0023 | 4.42  | NA    | NA   | 2471    | 2242    |
| 0.0014 | 4.38  | NA    | NA   | 37419   | 32263   |
| 0.0141 | 4.44  | NA    | NA   | 21108   | 22839   |
| 0.0148 | 4.40  | NA    | NA   | 40473   | 34767   |
| 0.0239 | 4.40  | NA    | NA   | 15854   | 13858   |
| 0.0047 | 4.40  | NA    | NA   | 13931   | 11284   |
| 0.0035 | 4.19  | 4.71  | 0.52 | 21619   | 20629   |
| 0.0010 | 7.56  | 8.55  | 0.99 | 502378  | 745999  |
| 0.0003 | 7.56  | NA    | NA   | 276648  | 528343  |
| 0.0017 | 25.50 | 26.30 | 0.80 | 34113   | 36101   |
| 0.0012 | 19.16 | 19.11 | 0.05 | 1485    | 1715    |
| 0.0012 | 28.53 | 28.10 | 0.43 | 98331   | 107073  |
| 0.0008 | 28.13 | 28.10 | 0.03 | 1739950 | 1781713 |
| 0.0065 | 28.67 | 28.10 | 0.57 | 53461   | 61777   |
| 0.0057 | 28.82 | 28.10 | 0.72 | 18769   | 15457   |
| 0.0006 | 28.84 | 28.10 | 0.74 | 212702  | 183802  |
| 0.0011 | 28.46 | 28.12 | 0.34 | 102705  | 115804  |
| 0.0047 | 27.94 | NA    | NA   | 26855   | 28242   |
| 0.0021 | 20.30 | 20.50 | 0.20 | 15676   | 26162   |
| 0.0002 | 23.29 | 23.71 | 0.42 | 1145    | 4377    |
| 0.0019 | 24.22 | 24.21 | 0.01 | 120946  | 111866  |
| 0.0014 | 18.82 | 19.03 | 0.21 | 44968   | 47225   |
| 0.0012 | 6.87  | 7.37  | 0.50 | 133891  | 285938  |
| 0.0017 | 4.86  | 4.66  | 0.20 | 20963   | 34478   |
| 0.0012 | 4.79  | 4.82  | 0.03 | 1683    | 2390    |
| 0.0019 | 4.58  | 4.52  | 0.06 | 259413  | 273566  |
| 0.0005 | 23.90 | 24.00 | 0.10 | 42145   | 40395   |
| 0.0021 | 23.90 | NA    | NA   | 65337   | 60720   |
| 0.0001 | 22.67 | NA    | NA   | 18521   | 14402   |
| 0.0089 | 4.52  | NA    | NA   | 11436   | 9403    |
| 0.0112 | 4.52  | NA    | NA   | 9907    | 7877    |
| 0.0068 | 4.43  | NA    | NA   | 1536    | 1332    |
| 0.0006 | 3.82  | NA    | NA   | 2497    | 4209    |
| 0.0224 | 4.20  | NA    | NA   | 4458    | 4172    |
| 0.0135 | 3.85  | NA    | NA   | 3415    | 4606    |
| 0.0164 | 4.20  | NA    | NA   | 4275    | 4253    |
| 0.0017 | 4.29  | NA    | NA   | 6684    | 5464    |
| 0.0049 | 4.22  | NA    | NA   | 6434    | 5086    |
| 0.0201 | 3.87  | NA    | NA   | 645     | 1328    |
| 0.0006 | 11.11 | 11.24 | 0.13 | 138744  | 292448  |
| 0.0004 | 11.19 | 10.60 | 0.59 | 75601   | 169369  |
| 0.0111 | 23.68 | 23.70 | 0.02 | 6623    | 3646    |
| 0.0015 | 5.63  | 5.38  | 0.25 | 21258   | 31004   |
| 0.0002 | 12.06 | 12.12 | 0.06 | 4170714 | 4311697 |
| 0.0011 | 6.36  | 6.39  | 0.03 | 654623  | 691028  |
| 0.0009 | 5.75  | 6.09  | 0.34 | 599688  | 997993  |
| 0.0013 | 6.33  | 6.82  | 0.49 | 40137   | 103445  |

|        |      |      |      |       |       |
|--------|------|------|------|-------|-------|
| 0.0026 | 4.80 | 4.87 | 0.07 | 849   | 932   |
| 0.0026 | 5.42 | 4.56 | 0.86 | 3648  | 18681 |
| 0.0003 | 8.72 | 8.66 | 0.06 | 764   | 3764  |
| 0.0012 | 4.84 | NA   | NA   | 10571 | 12447 |

| <b>B20</b> | <b>B21</b> | <b>B22</b> | <b>B25</b> | <b>B26</b> | <b>B28</b> |
|------------|------------|------------|------------|------------|------------|
| 417        | 1305       | 1120       | 886        | 284        | 1525       |
| 3545       | 2515       | 3142       | 2384       | 2904       | 3151       |
| 433        | 1183       | 571        | 1141       | 571        | 878        |
| 289698     | 262528     | 221424     | 270580     | 254494     | 339721     |
| 20490      | 22417      | 20460      | 20330      | 20435      | 19436      |
| 1073       | 1472       | 736        | 1350       | 1306       | 697        |
| 17921      | 12745      | 8212       | 14189      | 11134      | 17172      |
| 18650      | 15315      | 15371      | 15253      | 16431      | 15931      |
| 10303      | 9686       | 9824       | 10815      | 9778       | 11023      |
| 233299     | 250899     | 239246     | 183465     | 243208     | 203311     |
| 1000593    | 1149128    | 1299868    | 1221876    | 1013632    | 1769981    |
| 54187      | 51817      | 43812      | 78322      | 96059      | 56761      |
| 609        | 4116       | 942        | 11125      | 12349      | 609        |
| 57483      | 72399      | 72831      | 54287      | 71187      | 70981      |
| 14617      | 13813      | 24031      | 19618      | 17564      | 14787      |
| 3527       | 3241       | 5857       | 2818       | 3508       | 3632       |
| 26413      | 24117      | 14949      | 14783      | 12137      | 26365      |
| 136197     | 111930     | 150557     | 156886     | 127309     | 168513     |
| 4219       | 4534       | 1835       | 3027       | 2435       | 4078       |
| 3720       | 3003       | 4375       | 6263       | 4689       | 3194       |
| 6126       | 8453       | 5242       | 10078      | 10520      | 10227      |
| 7726       | 6589       | 8076       | 6008       | 7084       | 7690       |
| 114292     | 101398     | 117283     | 108683     | 126321     | 95056      |
| 21983      | 21668      | 19392      | 34590      | 22785      | 25120      |
| 6842       | 10865      | 6487       | 13256      | 8090       | 7482       |
| 98427      | 155731     | 131301     | 111645     | 147383     | 86716      |
| 4811       | 9062       | 9060       | 8117       | 6269       | 6552       |
| 90633      | 102535     | 91916      | 105070     | 104955     | 118957     |
| 146159     | 137294     | 154311     | 143708     | 127192     | 184251     |
| 25589      | 26452      | 25012      | 25870      | 25138      | 25084      |
| 174664     | 232372     | 198026     | 185541     | 179389     | 431395     |
| 88010      | 126722     | 94708      | 103373     | 146934     | 239511     |
| 47356      | 50233      | 50418      | 50119      | 48110      | 49790      |
| 28         | 89         | 1045       | 626        | 1367       | 81         |
| 1276       | 1492       | 1505       | 4759       | 10061      | 1861       |
| 5198       | 10399      | 6069       | 9190       | 15737      | 9783       |
| 2546       | 3847       | 4776       | 4406       | 6402       | 3342       |
| 75440      | 49382      | 10133      | 19188      | 12737      | 108127     |
| 8928       | 7219       | 11763      | 7617       | 7180       | 7859       |
| 38476      | 50053      | 60535      | 82124      | 56161      | 52296      |
| 19148      | 27163      | 5180       | 6733       | 5378       | 20183      |
| 128990     | 144533     | 195163     | 164625     | 167408     | 171762     |
| 48601      | 36753      | 34581      | 97439      | 90651      | 46207      |
| 14058      | 16699      | 11210      | 19002      | 14359      | 9957       |
| 47574      | 39584      | 59909      | 53452      | 48737      | 48706      |
| 17088      | 17854      | 23128      | 18748      | 17772      | 19541      |
| 10356      | 13796      | 18312      | 7364       | 11562      | 11406      |

|           |           |          |          |           |          |
|-----------|-----------|----------|----------|-----------|----------|
| 20580     | 23909     | 30038    | 28298    | 28119     | 23884    |
| 22742     | 22112     | 25095    | 23051    | 22423     | 23543    |
| 35489     | 34899     | 35356    | 38812    | 39301     | 35408    |
| 27396     | 26847     | 32607    | 33092    | 30542     | 26630    |
| 83553     | 78912     | 151055   | 84143    | 111872    | 79587    |
| 46657     | 43828     | 47708    | 19944    | 39651     | 39868    |
| 81004     | 73919     | 61031    | 67997    | 53177     | 78682    |
| 263066.5  | 318467    | 242574   | 273735.5 | 377306.5  | 241434.5 |
| 27838     | 44731     | 30093    | 36403    | 36798     | 25914    |
| 37407     | 55877     | 81082    | 15746    | 5795      | 11785    |
| 23483     | 20143     | 33295    | 45676    | 93646     | 29226    |
| 2833      | 2418      | 1602     | 3090     | 2328      | 2096     |
| 209932    | 197839    | 189796   | 129175   | 254668    | 206252   |
| 29636     | 30849     | 28835    | 27264    | 32098     | 36736    |
| 87263     | 126792    | 57751    | 186767   | 76046     | 62486    |
| 107078    | 91206     | 90051    | 73047    | 67956     | 99308    |
| 4433      | 3088      | 2500     | 3590     | 3362      | 2885     |
| 561499    | 597498    | 419756   | 349155   | 423621    | 636662   |
| 4778      | 5148      | 7573     | 7361     | 7546      | 5911     |
| 3401      | 3530      | 4405     | 4177     | 4180      | 3621     |
| 5682      | 8122      | 4539     | 5149     | 5263      | 9800     |
| 12514     | 12487     | 11882    | 20834    | 20895     | 16355    |
| 77672     | 110095    | 89220    | 89887    | 109407    | 141549   |
| 4285      | 10940     | 3353     | 2901     | 2818      | 5396     |
| 10879     | 9828      | 7422     | 6239     | 7525      | 10257    |
| 44218     | 30131     | 52972    | 17289    | 30293     | 39679    |
| 4670      | 4112      | 5000     | 3612     | 5549      | 5039     |
| 68920     | 54755     | 32607    | 135750   | 141823    | 34744    |
| 87447     | 80509     | 88503    | 92959    | 84514     | 92682    |
| 2025      | 2780      | 2292     | 2015     | 2830      | 2088     |
| 278       | 238       | 347      | 413      | 411       | 334      |
| 89099     | 113956    | 85427    | 58308    | 207467    | 230947   |
| 1064      | 1256      | 2756     | 527      | 2466      | 2816     |
| 106171    | 101509    | 30615    | 29521    | 32180     | 99326    |
| 48768     | 48611     | 45550    | 25590    | 40065     | 28262    |
| 17426     | 17224     | 21411    | 19277    | 19305     | 17283    |
| 1492      | 1445      | 1201     | 1819.5   | 1879.5    | 1449     |
| 15835     | 19737     | 12195    | 9698     | 16341     | 11740    |
| 19606     | 19536     | 22134    | 18024    | 24717     | 19487    |
| 205611    | 213634    | 170402   | 188376   | 163849    | 201410   |
| 854668    | 775968    | 796783   | 712109   | 775119    | 804322   |
| 8977      | 10131     | 4663.5   | 4333     | 3241      | 16734.5  |
| 633       | 1068      | 1712     | 17513    | 1239      | 693      |
| 19280     | 17492     | 20073    | 18642    | 17249     | 19266    |
| 1397058.5 | 1086523.5 | 514636.5 | 2313229  | 3427333.5 | 689013   |
| 8286      | 8136      | 10416    | 8078     | 11512     | 9457     |
| 39104     | 47497     | 42986    | 29765    | 42132     | 39254    |
| 27487     | 34226     | 36397    | 27848    | 34781     | 39868    |

|          |          |          |          |          |          |
|----------|----------|----------|----------|----------|----------|
| 16840    | 15868    | 13956    | 7975     | 13812    | 16061    |
| 14573    | 11208    | 8960     | 6113     | 9086     | 13673    |
| 25221    | 24264    | 15700    | 6405     | 23424    | 18270    |
| 6517     | 6437     | 6724     | 2246     | 3940     | 6290     |
| 191841   | 170042   | 200066   | 168756   | 221576   | 328779   |
| 52801    | 55635    | 68504    | 50262    | 67151    | 59010    |
| 28748    | 29504    | 19371    | 19865    | 16483    | 32522    |
| 41237    | 39580    | 37746    | 25701    | 39578    | 43212    |
| 28563    | 28136    | 23678    | 79561    | 30549    | 32836    |
| 1142226  | 1016575  | 1051924  | 991265   | 995389   | 1004815  |
| 290225   | 280307   | 484993   | 344511   | 487271   | 296981   |
| 415403   | 468717   | 557387   | 356678   | 475990   | 434647   |
| 1953     | 1748     | 1723     | 20820    | 2196     | 1950     |
| 17724    | 16825    | 18394    | 17118    | 16087    | 16006    |
| 39336    | 36914    | 42808    | 43213    | 40005    | 35989    |
| 31823340 | 32874607 | 44969806 | 30978976 | 41005605 | 33428726 |
| 178207   | 170754   | 234478   | 143000   | 188245   | 136156   |
| 12075304 | 12150200 | 14620169 | 11524778 | 13102870 | 9656915  |
| 2388115  | 2532708  | 3163478  | 3016337  | 2940169  | 3318827  |
| 61599    | 56282    | 73053    | 52692    | 69192    | 48215    |
| 677778   | 680868   | 864040   | 619842   | 825913   | 623052   |
| 298777   | 363967   | 348377   | 269882   | 355848   | 238080   |
| 2949489  | 2531788  | 4729032  | 2841843  | 3365339  | 2876723  |
| 70512    | 79477    | 52179    | 61538    | 72223    | 54586    |
| 124034   | 110205   | 51910    | 89072    | 67415    | 46453    |
| 13717    | 20464    | 48492    | 8399     | 13059    | 37057    |
| 757      | 1275     | 824      | 447      | 535      | 1524     |
| 259325   | 265254   | 322548   | 282322   | 286452   | 323742   |
| 47084    | 58525    | 76022    | 47168    | 62609    | 69844    |
| 6235     | 4253     | 5050     | 3010     | 4346     | 2350     |
| 206249   | 71164    | 211868   | 359856   | 300398   | 104306   |
| 5276     | 8192     | 6614     | 9777     | 7599     | 14071    |
| 23647    | 20846    | 20052    | 28007    | 39681    | 17364    |
| 5085     | 4970     | 2909     | 642      | 572      | 945      |
| 10641    | 9335     | 5997     | 6588     | 5285     | 9422     |
| 28829    | 41439    | 42152    | 34879    | 46278    | 45293    |
| 4298     | 4981     | 4085     | 4669     | 4473     | 4222     |
| 52903    | 52896    | 45400    | 58970    | 84397    | 58050    |
| 42660    | 54767    | 20137    | 24913    | 25274    | 32679    |
| 121944   | 116042   | 145817   | 109905   | 123994   | 123618   |
| 16448    | 16745    | 13700    | 18292    | 15681    | 14631    |
| 660269   | 705582   | 656941   | 670392   | 630456   | 743863   |
| 34538    | 40108    | 73757    | 92084    | 69287    | 59538    |
| 46034    | 51173    | 40965    | 35263    | 33081    | 50773    |
| 24557    | 29040    | 11012    | 69084    | 69020    | 12409    |
| 5535     | 4947     | 5633     | 16568    | 14310    | 4563     |
| 19872    | 19921    | 14926    | 5185     | 10271    | 16422    |
| 20607    | 24971    | 12905    | 17875    | 15796    | 16084    |

|         |         |         |         |         |         |
|---------|---------|---------|---------|---------|---------|
| 44966   | 46392   | 21478   | 38930   | 16109   | 17949   |
| 6152    | 9530    | 7712    | 11157   | 10090   | 8413    |
| 17024   | 7080    | 19528   | 11523   | 21340   | 6508    |
| 74676   | 121909  | 85322   | 70204   | 63767   | 183380  |
| 106026  | 106945  | 115808  | 100588  | 109846  | 106879  |
| 34334   | 47937   | 58482   | 68887   | 60373   | 54335   |
| 460904  | 398556  | 503610  | 352248  | 384216  | 358505  |
| 563332  | 550072  | 565236  | 551453  | 523475  | 556651  |
| 23550   | 23602   | 25068   | 21477   | 19386   | 23305   |
| 20116   | 20201   | 24603   | 25097   | 25579   | 18308   |
| 6362    | 6297    | 7850    | 5439    | 8280    | 6299    |
| 35167   | 34841   | 44619   | 45180   | 41364   | 36931   |
| 7008    | 7292    | 8272    | 7748    | 7469    | 7261    |
| 7289    | 8071    | 9654    | 9590    | 9455    | 8064    |
| 1848    | 1880    | 2279    | 2200    | 1755    | 2070    |
| 17197   | 17875   | 23254   | 18373   | 19937   | 17971   |
| 1978    | 1735    | 2582    | 2711    | 3218    | 2486    |
| 3370    | 3785    | 4800    | 4700    | 5127    | 3243    |
| 8053    | 7388    | 10739   | 9833    | 10433   | 7295    |
| 1982    | 2149    | 2212    | 2308    | 2144    | 2121    |
| 14250   | 15981   | 12164   | 10928   | 9729    | 15604   |
| 2697    | 2944    | 3301    | 2576    | 3091    | 3191    |
| 34810   | 35140   | 38805   | 36116   | 35389   | 35508   |
| 29906   | 28007   | 28635   | 27653   | 25178   | 30499   |
| 3754    | 3506    | 4995    | 3754    | 4799    | 3853    |
| 9652    | 10366   | 12369   | 10500   | 12909   | 11438   |
| 20953   | 22508   | 21816   | 19363   | 18630   | 22820   |
| 29791   | 31449   | 29403   | 27489   | 26783   | 31625   |
| 33741   | 34437   | 43243   | 38606   | 37330   | 35222   |
| 219844  | 160349  | 256826  | 184227  | 256340  | 157910  |
| 2098    | 1665    | 2130    | 2202    | 2766    | 1438    |
| 23327   | 22741   | 28136   | 26875   | 32918   | 26600   |
| 67125   | 44866   | 42425   | 39434   | 59343   | 60530   |
| 18155   | 14555   | 16895   | 21358   | 22565   | 14949   |
| 833     | 708     | 702     | 580     | 872     | 635     |
| 4208484 | 5612421 | 5345935 | 5522204 | 5066224 | 4681615 |
| 6456    | 4187    | 1803    | 2005    | 2349    | 3203    |
| 18534   | 19340   | 12971   | 17417   | 16604   | 18106   |
| 1130    | 29705   | 5471    | 6941    | 4502    | 54783   |
| 2234    | 871719  | 165890  | 149868  | 141479  | 1410217 |
| 16312   | 10750   | 7587    | 7696    | 8404    | 7232    |
| 14060   | 17337   | 18396   | 9664    | 15700   | 13682   |
| 77246   | 81377   | 59066   | 63497   | 68588   | 67802   |
| 5244    | 5652    | 3779    | 6955    | 5196    | 6168    |
| 110385  | 131000  | 94297   | 162884  | 128177  | 71161   |
| 19467   | 19744   | 19864   | 28271   | 30576   | 19825   |
| 1391    | 708     | 1788    | 2135    | 1593    | 2490    |
| 12105   | 10923   | 11861   | 9372    | 9604    | 10942   |

|         |         |         |         |         |         |
|---------|---------|---------|---------|---------|---------|
| 24012   | 24279   | 21990   | 22347   | 21408   | 26494   |
| 1579    | 2042    | 2937    | 2608    | 3073    | 2037    |
| 34738   | 36331   | 36145   | 32315   | 32141   | 36953   |
| 22206   | 23786   | 20423   | 17739   | 17479   | 23773   |
| 34979   | 33356   | 41866   | 39769   | 36522   | 37326   |
| 13516   | 13871   | 15734   | 13045   | 12867   | 15481   |
| 12174   | 11926   | 13761   | 12488   | 11616   | 13938   |
| 19950   | 21559   | 15793   | 15817   | 18285   | 16377   |
| 667279  | 569705  | 489095  | 506763  | 477266  | 721972  |
| 291633  | 353042  | 188455  | 180170  | 227202  | 329571  |
| 28928   | 30198   | 27149   | 29820   | 30305   | 34514   |
| 3289    | 3348    | 3541    | 1968    | 3526    | 3909    |
| 128398  | 122569  | 150414  | 110481  | 169556  | 142123  |
| 2384459 | 2214713 | 5895281 | 2356056 | 4526782 | 3139245 |
| 90314   | 83092   | 270919  | 127478  | 194495  | 136859  |
| 23983   | 20217   | 66109   | 40703   | 42570   | 32361   |
| 277433  | 226089  | 615504  | 426625  | 414406  | 326725  |
| 134546  | 124780  | 109996  | 114535  | 141019  | 147686  |
| 35187   | 33011   | 40425   | 43495   | 42020   | 45066   |
| 25401   | 20348   | 20908   | 87929   | 70358   | 23174   |
| 1894    | 1938    | 4391    | 4068    | 6160    | 1406    |
| 126544  | 131447  | 140956  | 115302  | 178459  | 120946  |
| 50331   | 40575   | 53875   | 33166   | 30972   | 33448   |
| 238801  | 197636  | 137391  | 457480  | 1489361 | 132227  |
| 38466   | 37110   | 44448   | 19830   | 38957   | 45089   |
| 7205    | 1214    | 931     | 171     | 1049    | 736     |
| 386438  | 378477  | 385938  | 393423  | 514237  | 302453  |
| 32051   | 38551   | 41671   | 103271  | 42531   | 40152   |
| 61059   | 63984   | 63592   | 68195   | 66077   | 63816   |
| 17787   | 20089   | 17121   | 15227   | 19266   | 10017   |
| 10585   | 11712   | 13054   | 14776   | 14728   | 10535   |
| 9576    | 9395    | 11425   | 11852   | 11948   | 8466    |
| 1427    | 1402    | 1628    | 1719    | 1844    | 1039    |
| 4037    | 3863    | 4900    | 3088    | 3929    | 4165    |
| 4317    | 3520    | 3925    | 4089    | 4000    | 4187    |
| 4953    | 4264    | 4928    | 4590    | 4919    | 4751    |
| 5978    | 5813    | 6250    | 4337    | 6841    | 8060    |
| 5577    | 5972    | 5082    | 6773    | 4442    | 6163    |
| 4663    | 4207    | 3350    | 6420    | 4495    | 5123    |
| 1340    | 1100    | 1177    | 848     | 1409    | 1348    |
| 112324  | 120167  | 170324  | 129334  | 86358   | 123516  |
| 109912  | 81403   | 73336   | 107297  | 82577   | 91493   |
| 4476    | 4519    | 6626    | 3489    | 3046    | 4260    |
| 45868   | 43843   | 64585   | 26404   | 47680   | 43126   |
| 3616711 | 5002289 | 4833427 | 3613609 | 4555037 | 4646643 |
| 606086  | 657856  | 813714  | 781234  | 884848  | 762193  |
| 831785  | 685338  | 438878  | 1152945 | 2942925 | 478224  |
| 58638   | 61061   | 50543   | 70660   | 144531  | 44603   |

|       |       |       |       |       |       |
|-------|-------|-------|-------|-------|-------|
| 693   | 508   | 330   | 868   | 2543  | 561   |
| 5063  | 7201  | 6402  | 851   | 0     | 1285  |
| 420   | 988   | 672   | 1675  | 28249 | 1064  |
| 17088 | 12890 | 14677 | 13623 | 14861 | 12796 |



| <b>B5</b> | <b>C11</b> | <b>C14</b> | <b>C16</b> | <b>C18</b> | <b>C19</b> |
|-----------|------------|------------|------------|------------|------------|
| 1080      | 1077       | 794        | 884        | 327        | 879        |
| 3271      | 2558       | 2765       | 3995       | 2921       | 1968       |
| 721       | 1027       | 891        | 797        | 636        | 1225       |
| 284081    | 270364     | 306771     | 280198     | 301494     | 299525     |
| 19988     | 20481      | 21604      | 20845      | 20707      | 21780      |
| 1743      | 578        | 1772       | 1431       | 1730       | 1878       |
| 17779     | 13633      | 16442      | 14244      | 14929      | 22468      |
| 20153     | 18829      | 17161      | 14878      | 15969      | 33860      |
| 11856     | 10618      | 10702      | 10314      | 10188      | 12382      |
| 242818    | 264094     | 222347     | 205594     | 230221     | 185468     |
| 1435867   | 1274832    | 1371584    | 967380     | 1378525    | 1094536    |
| 43496     | 51966      | 47428      | 39982      | 45096      | 66315      |
| 1924      | 1218       | 2016       | 609        | 2273       | 14627      |
| 57059     | 85591      | 87240      | 50752      | 51590      | 48265      |
| 17199     | 18058      | 18996      | 17543      | 17493      | 22211      |
| 2784      | 3192       | 4252       | 3043       | 3529       | 3048       |
| 24761     | 23002      | 25575      | 26361      | 11114      | 7071       |
| 118497    | 176221     | 168682     | 219954     | 132721     | 165639     |
| 3840      | 3739       | 3300       | 3596       | 2123       | 2830       |
| 5138      | 2939       | 5320       | 2781       | 2487       | 4905       |
| 18223     | 7032       | 16779      | 12373      | 7603       | 12482      |
| 8289      | 10369      | 9398       | 8047       | 5010       | 4583       |
| 106241    | 119373     | 102873     | 99013      | 126581     | 132939     |
| 33961     | 22400      | 21805      | 33751      | 14969      | 22328      |
| 7086      | 12618      | 6349       | 5485       | 11122      | 9877       |
| 143383    | 91794      | 108024     | 108598     | 130218     | 82914      |
| 13029     | 11727      | 23119      | 17816      | 13380      | 9998       |
| 103002    | 109075     | 140443     | 96900      | 98142      | 114008     |
| 158793    | 150123     | 138606     | 136419     | 128688     | 120675     |
| 27667     | 28552      | 26866      | 23545      | 25618      | 32475      |
| 205137    | 238315     | 378760     | 246479     | 209375     | 220914     |
| 176256    | 403217     | 367053     | 74031      | 78525      | 95120      |
| 50817     | 49449      | 52502      | 49750      | 50574      | 55510      |
| 493       | 47         | 187        | 66         | 712        | 413        |
| 1168      | 2981       | 4469       | 931        | 2069       | 10232      |
| 8039      | 19537      | 26528      | 6714       | 8225       | 20709      |
| 3173      | 8436       | 11104      | 3710       | 3444       | 10883      |
| 133386    | 21350      | 31484      | 25357      | 21602      | 9288       |
| 12098     | 6602       | 9276       | 5586       | 6725       | 4529       |
| 54227     | 52970      | 67278      | 45377      | 65673      | 68639      |
| 28014     | 13656      | 16855      | 12062      | 12642      | 5719       |
| 153563    | 172200     | 195424     | 148575     | 205592     | 185193     |
| 64061     | 22155      | 15203      | 99648      | 52460      | 103656     |
| 16112     | 8125       | 12677      | 12186      | 14766      | 10359      |
| 142782    | 53547      | 46867      | 33053      | 38608      | 42214      |
| 26295     | 18573      | 18390      | 17595      | 23373      | 22624      |
| 10932     | 18079      | 17782      | 14873      | 12391      | 11208      |

|          |           |          |           |        |         |
|----------|-----------|----------|-----------|--------|---------|
| 23030    | 27460     | 26168    | 26236     | 28218  | 27352   |
| 20254    | 26061     | 22792    | 25710     | 21968  | 24972   |
| 32755    | 32842     | 33833    | 34803     | 38495  | 43669   |
| 28494    | 24155     | 26849    | 28273     | 31133  | 34250   |
| 78737    | 96583     | 77789    | 77150     | 90185  | 89867   |
| 47587    | 45817     | 36324    | 25402     | 26636  | 21243   |
| 74032    | 66184     | 66442    | 74662     | 61931  | 63009   |
| 372249.5 | 229826    | 234161.5 | 265558    | 280746 | 305029  |
| 43637    | 20139     | 21838    | 25316     | 32970  | 20807   |
| 20209    | 83280     | 99123    | 36538     | 44867  | 26303   |
| 11553    | 50501     | 23020    | 32528     | 27069  | 51075   |
| 2623     | 2335      | 2872     | 2460      | 2986   | 2754    |
| 211499   | 195730    | 188099   | 145609    | 154569 | 213019  |
| 34330    | 36609     | 42610    | 30324     | 26916  | 30538   |
| 91404    | 169178    | 56567    | 39733     | 108268 | 98293   |
| 124395   | 114547    | 110617   | 99263     | 85965  | 102638  |
| 4247     | 3808      | 4138     | 5286      | 3389   | 3102    |
| 628478   | 503082    | 543698   | 443465    | 557854 | 334602  |
| 4719     | 6458      | 6253     | 6899      | 6101   | 7822    |
| 3985     | 4831      | 4075     | 3442      | 4091   | 4247    |
| 5910     | 6441      | 11908    | 7307      | 4801   | 4480    |
| 14034    | 16832     | 19136    | 9858      | 10366  | 20101   |
| 143481   | 252637    | 235200   | 78762     | 83941  | 108923  |
| 3644     | 8278      | 16420    | 2755      | 3343   | 7335    |
| 11445    | 8445      | 10352    | 8920      | 8597   | 7350    |
| 27983    | 58889     | 47523    | 29891     | 36532  | 29408   |
| 5072     | 4441      | 3685     | 5696      | 4504   | 4488    |
| 32800    | 54668     | 50796    | 53209     | 41078  | 82242   |
| 89122    | 83819     | 83956    | 79112     | 93231  | 90074   |
| 2207     | 2556      | 2737     | 2573      | 2527   | 2349    |
| 424      | 579       | 272      | 469       | 460    | 411     |
| 62511    | 101774    | 151992   | 75453     | 91733  | 76026   |
| 818      | 2002      | 2196     | 1215      | 992    | 1261    |
| 118264   | 127669    | 112166   | 105049    | 48032  | 38698   |
| 55802    | 42371     | 46354    | 26755     | 46922  | 26849   |
| 18762    | 20028     | 19489    | 20553     | 19541  | 20020   |
| 1330.5   | 1891      | 1625.5   | 1628      | 1695   | 2068    |
| 10216    | 19956     | 13657    | 14323     | 12504  | 10927   |
| 19015    | 39278     | 36445    | 14678     | 19306  | 26995   |
| 179923   | 215225    | 206136   | 194774    | 173297 | 178113  |
| 782295   | 900113    | 866669   | 801549    | 741740 | 743093  |
| 15798.5  | 6152      | 7225     | 6369.5    | 6314.5 | 1319.5  |
| 230      | 1421      | 2014     | 341       | 176    | 451     |
| 19256    | 18968     | 19132    | 17853     | 22026  | 23686   |
| 610875   | 1029476.5 | 891534.5 | 1144339.5 | 889663 | 2680616 |
| 8101     | 8892      | 8003     | 11673     | 8485   | 7095    |
| 45403    | 43366     | 38142    | 39925     | 32745  | 35456   |
| 36851    | 42067     | 47191    | 26502     | 28930  | 31270   |

|          |          |          |          |          |          |
|----------|----------|----------|----------|----------|----------|
| 16968    | 14640    | 11334    | 16260    | 10257    | 9209     |
| 10765    | 6801     | 7921     | 9413     | 6163     | 6115     |
| 17467    | 27297    | 18193    | 27789    | 17118    | 14656    |
| 5215     | 7190     | 4313     | 4831     | 6461     | 4010     |
| 305569   | 244710   | 311797   | 115469   | 240203   | 268726   |
| 59039    | 49311    | 55434    | 64596    | 49955    | 48464    |
| 28853    | 26150    | 29598    | 31424    | 20361    | 19113    |
| 41840    | 46527    | 45895    | 43274    | 47395    | 35614    |
| 21375    | 25092    | 24587    | 20704    | 32231    | 40514    |
| 1314176  | 956526   | 862300   | 805716   | 954222   | 856177   |
| 295588   | 262482   | 263412   | 596713   | 268329   | 323150   |
| 478229   | 643861   | 561122   | 460986   | 438763   | 421470   |
| 1931     | 3469     | 2683     | 2609     | 2033     | 3013     |
| 18314    | 18859    | 18997    | 18521    | 17971    | 16648    |
| 40825    | 46548    | 44782    | 36454    | 41751    | 38884    |
| 33116292 | 45238299 | 39717944 | 31403593 | 38305798 | 36004100 |
| 182479   | 227807   | 218225   | 174607   | 160464   | 201914   |
| 12023354 | 14039245 | 11839953 | 8914032  | 11816462 | 11664334 |
| 2682047  | 2843807  | 3203629  | 2652411  | 3452929  | 3077502  |
| 61423    | 59764    | 47988    | 54300    | 56891    | 58142    |
| 671003   | 859249   | 819476   | 682267   | 778387   | 718507   |
| 302408   | 384143   | 320350   | 267477   | 282132   | 304905   |
| 2887897  | 5614459  | 5052006  | 3317253  | 3245124  | 2730314  |
| 79148    | 58826    | 52107    | 63491    | 53627    | 50934    |
| 73824    | 68472    | 86907    | 74821    | 49793    | 101079   |
| 19758    | 23488    | 16241    | 22174    | 23193    | 6894     |
| 1497     | 505      | 947      | 1827     | 366      | 469      |
| 295523   | 253030   | 275892   | 291330   | 242782   | 246119   |
| 60885    | 48244    | 54553    | 45262    | 49271    | 57106    |
| 3700     | 4705     | 6569     | 1918     | 2553     | 9471     |
| 189423   | 115129   | 119844   | 110014   | 166642   | 400935   |
| 8769     | 9760     | 8018     | 8211     | 7435     | 5860     |
| 23492    | 22054    | 19258    | 23186    | 36202    | 45728    |
| 558      | 4786     | 13509    | 3420     | 3963     | 2625     |
| 8930     | 9013     | 8353     | 8804     | 7509     | 10010    |
| 31222    | 29835    | 21113    | 34114    | 24827    | 25511    |
| 5580     | 6567     | 5679     | 1757     | 4152     | 3227     |
| 73548    | 46672    | 41061    | 107777   | 54228    | 46391    |
| 47857    | 45824    | 46772    | 35235    | 30575    | 25912    |
| 140790   | 142563   | 151595   | 116821   | 101911   | 115261   |
| 18071    | 14105    | 14843    | 14835    | 18097    | 18331    |
| 732315   | 807547   | 746161   | 858950   | 545067   | 684677   |
| 37369    | 45828    | 57582    | 40024    | 98753    | 82291    |
| 40779    | 44974    | 46516    | 44437    | 35993    | 36822    |
| 12149    | 30122    | 29251    | 9728     | 30362    | 81409    |
| 4334     | 5916     | 7203     | 5310     | 6511     | 15249    |
| 9208     | 28043    | 25415    | 15465    | 18718    | 27252    |
| 29111    | 13498    | 14053    | 17396    | 10953    | 15379    |

|         |         |         |         |         |         |
|---------|---------|---------|---------|---------|---------|
| 25274   | 19562   | 27185   | 22935   | 19876   | 29648   |
| 6255    | 8963    | 9825    | 12957   | 12313   | 13349   |
| 14698   | 14843   | 9504    | 7018    | 22088   | 26344   |
| 95722   | 112432  | 127316  | 112686  | 81784   | 100435  |
| 104803  | 97988   | 98203   | 100937  | 109051  | 99045   |
| 47920   | 44142   | 50541   | 44895   | 70399   | 57561   |
| 434366  | 440634  | 480114  | 246525  | 341774  | 344396  |
| 556935  | 441755  | 494469  | 559558  | 575781  | 626721  |
| 23593   | 23169   | 25210   | 24336   | 24681   | 22795   |
| 18241   | 25010   | 21621   | 23624   | 23168   | 25108   |
| 6904    | 8439    | 6676    | 6831    | 7226    | 7930    |
| 32802   | 42154   | 40129   | 47281   | 37112   | 46669   |
| 7745    | 8825    | 8147    | 8194    | 8093    | 8583    |
| 7527    | 8892    | 8776    | 8996    | 8436    | 8621    |
| 1672    | 2804    | 2395    | 1940    | 2165    | 2130    |
| 15602   | 19704   | 19610   | 20689   | 17218   | 23098   |
| 1610    | 3205    | 2960    | 2971    | 3142    | 2672    |
| 4138    | 3919    | 4669    | 5096    | 4750    | 5521    |
| 7736    | 10228   | 8455    | 9924    | 9368    | 10990   |
| 1955    | 2379    | 2260    | 2672    | 2548    | 2301    |
| 12887   | 16943   | 14610   | 14820   | 14597   | 12110   |
| 3211    | 3370    | 2933    | 3032    | 3700    | 3343    |
| 32020   | 37782   | 36068   | 41565   | 35297   | 39380   |
| 26043   | 30399   | 27498   | 31618   | 28271   | 30387   |
| 3758    | 4731    | 3839    | 4205    | 4465    | 4538    |
| 8493    | 12114   | 10723   | 12543   | 11174   | 14211   |
| 18394   | 24648   | 22135   | 25114   | 23177   | 23402   |
| 27818   | 33372   | 31847   | 34188   | 34151   | 32487   |
| 31150   | 37832   | 37591   | 40089   | 35871   | 42876   |
| 171365  | 203634  | 182015  | 172643  | 239550  | 254367  |
| 1511    | 2379    | 1915    | 2257    | 2174    | 2369    |
| 24556   | 27546   | 23347   | 26149   | 29566   | 24841   |
| 74670   | 43513   | 73783   | 62237   | 42484   | 41854   |
| 14206   | 15047   | 16125   | 16352   | 23274   | 25704   |
| 633     | 982     | 732     | 1159    | 885     | 821     |
| 4264365 | 4610761 | 4353521 | 5008934 | 4187765 | 4931986 |
| 4447    | 6901    | 3507    | 3006    | 6389    | 4280    |
| 20560   | 18193   | 18306   | 17559   | 17484   | 16313   |
| 15860   | 10824   | 15340   | 22596   | 3840    | 2594    |
| 412457  | 301162  | 410984  | 634255  | 132419  | 62278   |
| 15748   | 31968   | 21266   | 17070   | 11036   | 6760    |
| 13440   | 29261   | 25544   | 20995   | 13344   | 11588   |
| 79312   | 63937   | 62775   | 76152   | 56807   | 54570   |
| 6257    | 3273    | 7276    | 6689    | 7350    | 5660    |
| 147268  | 96761   | 97405   | 87049   | 77380   | 72290   |
| 20311   | 22766   | 20655   | 20646   | 19548   | 20484   |
| 1508    | 9721    | 18143   | 1692    | 1058    | 1592    |
| 11313   | 11692   | 11723   | 11345   | 11201   | 9975    |

|         |         |         |         |         |         |
|---------|---------|---------|---------|---------|---------|
| 21116   | 27647   | 25415   | 26091   | 24135   | 27174   |
| 2074    | 2955    | 1951    | 2751    | 2527    | 3379    |
| 34882   | 38093   | 37042   | 39874   | 37945   | 36669   |
| 20887   | 25271   | 23385   | 23860   | 24564   | 21475   |
| 33924   | 39174   | 37811   | 45574   | 36071   | 42678   |
| 12325   | 16118   | 15430   | 16527   | 14316   | 16180   |
| 11102   | 13615   | 13478   | 14948   | 13894   | 13321   |
| 20803   | 16097   | 15141   | 18328   | 13343   | 14664   |
| 534473  | 786398  | 659995  | 681425  | 450210  | 556252  |
| 305932  | 423752  | 385530  | 323375  | 189879  | 219197  |
| 32294   | 33471   | 40715   | 28410   | 29168   | 31250   |
| 2458    | 3081    | 2022    | 1638    | 2759    | 1846    |
| 121389  | 133280  | 123590  | 135375  | 148941  | 131874  |
| 2246349 | 3041039 | 2593147 | 3006928 | 3528298 | 3127206 |
| 82693   | 118243  | 105733  | 105662  | 134607  | 138920  |
| 24115   | 26079   | 26232   | 27283   | 37178   | 47778   |
| 259374  | 292666  | 263696  | 285611  | 386782  | 503584  |
| 127221  | 150390  | 141841  | 137008  | 130022  | 114740  |
| 33826   | 35124   | 39116   | 39870   | 38274   | 43598   |
| 18116   | 23426   | 31182   | 29361   | 24289   | 74791   |
| 1575    | 5456    | 4524    | 1244    | 3674    | 6527    |
| 115164  | 130020  | 114045  | 126072  | 117402  | 145404  |
| 36869   | 46688   | 46917   | 30938   | 20975   | 48264   |
| 332628  | 187252  | 159887  | 162767  | 154878  | 622081  |
| 40419   | 41439   | 45715   | 27925   | 63832   | 37296   |
| 1190    | 1320    | 973     | 1228    | 791     | 1754    |
| 270222  | 472311  | 409496  | 359963  | 289842  | 468643  |
| 33466   | 40756   | 47034   | 37760   | 33544   | 34799   |
| 67034   | 61019   | 64054   | 62914   | 58549   | 66252   |
| 19039   | 6777    | 11830   | 20466   | 14494   | 17611   |
| 9680    | 13370   | 11756   | 12525   | 11643   | 15537   |
| 8825    | 10711   | 10111   | 10426   | 10097   | 12444   |
| 1297    | 1853    | 1064    | 1683    | 1895    | 1752    |
| 3631    | 4421    | 4124    | 4119    | 4031    | 3481    |
| 4513    | 4745    | 3959    | 3539    | 4004    | 4528    |
| 4411    | 4519    | 5176    | 4574    | 4146    | 4254    |
| 5720    | 8814    | 5482    | 6644    | 7322    | 5715    |
| 5150    | 5785    | 5579    | 5535    | 5885    | 6767    |
| 4939    | 4440    | 4399    | 5436    | 5071    | 4931    |
| 945     | 871     | 1181    | 1556    | 1412    | 987     |
| 194080  | 155959  | 110469  | 119654  | 93787   | 109447  |
| 130257  | 99622   | 96185   | 89781   | 82370   | 75183   |
| 5936    | 4029    | 4313    | 3868    | 3319    | 3886    |
| 47245   | 48914   | 36686   | 26959   | 32679   | 29577   |
| 4089589 | 4125418 | 3989138 | 4440441 | 3770837 | 4438930 |
| 662397  | 676111  | 701800  | 1105134 | 754290  | 746152  |
| 582792  | 587420  | 604712  | 673307  | 498575  | 1726567 |
| 49786   | 70818   | 68639   | 41778   | 43472   | 82419   |

|       |       |       |       |       |       |
|-------|-------|-------|-------|-------|-------|
| 811   | 710   | 695   | 469   | 959   | 5589  |
| 3429  | 6503  | 8606  | 4518  | 4210  | 3952  |
| 856   | 1608  | 2364  | 1644  | 868   | 11000 |
| 13860 | 19433 | 13889 | 15071 | 13755 | 15498 |

| <b>C2</b> | <b>C23</b> | <b>C27</b> | <b>C3</b> | <b>QC1</b> | <b>QC2</b> |
|-----------|------------|------------|-----------|------------|------------|
| 546       | 1268       | 497        | 604       | 900        | 342        |
| 2696      | 2547       | 3381       | 3075      | 2618       | 2372       |
| 861       | 927        | 1528       | 927       | 753        | 694        |
| 230483    | 298183     | 309238     | 289090    | 269971     | 268427     |
| 22206     | 20913      | 19810      | 22325     | 20685      | 21667      |
| 1127      | 1715       | 2871       | 1056      | 1400       | 350        |
| 14132     | 13841      | 17975      | 16473     | 12394      | 12150      |
| 18583     | 19273      | 17010      | 17918     | 24771      | 22867      |
| 12658     | 11391      | 11715      | 11626     | 11152      | 11251      |
| 209646    | 214124     | 224053     | 236394    | 223638     | 215715     |
| 1052567   | 1170055    | 1617932    | 1191040   | 1094847    | 1249051    |
| 38994     | 43335      | 57575      | 42674     | 56719      | 62105      |
| 3983      | 1391       | 1568       | 1015      | 2616       | 609        |
| 51440     | 64207      | 55301      | 94575     | 64814      | 62947      |
| 19284     | 25398      | 16707      | 21167     | 25195      | 24844      |
| 2166      | 5055       | 2448       | 5646      | 4099       | 3045       |
| 18427     | 10078      | 14634      | 23892     | 10765      | 9915       |
| 141461    | 199484     | 127328     | 142738    | 122636     | 157842     |
| 2864      | 2399       | 2901       | 2282      | 2619       | 2953       |
| 2053      | 3517       | 2805       | 4301      | 2195       | 2760       |
| 7452      | 14595      | 8173       | 9442      | 12520      | 11135      |
| 6103      | 6779       | 4700       | 8364      | 5621       | 8363       |
| 116452    | 128227     | 167621     | 107568    | 145330     | 126661     |
| 24583     | 22630      | 19507      | 20838     | 17980      | 18252      |
| 6136      | 13217      | 5228       | 6442      | 9126       | 8734       |
| 104424    | 102183     | 117843     | 92270     | 78884      | 53026      |
| 4936      | 10041      | 5498       | 10492     | 8778       | 10418      |
| 125550    | 98346      | 104267     | 123726    | 98368      | 98507      |
| 157834    | 158683     | 159707     | 156547    | 108236     | 138437     |
| 28831     | 27138      | 27676      | 25986     | 33232      | 29255      |
| 166886    | 209506     | 273523     | 318837    | 200959     | 148105     |
| 290259    | 76274      | 82034      | 313714    | 176755     | 160726     |
| 49975     | 49551      | 47267      | 49884     | 46768      | 51204      |
| 130       | 107        | 301        | 31        | 3771       | 131        |
| 1559      | 1190       | 2089       | 1292      | 3552       | 4208       |
| 15467     | 7545       | 5030       | 7526      | 13582      | 17639      |
| 6760      | 3124       | 1803       | 1672      | 7898       | 7237       |
| 11429     | 9447       | 20054      | 20647     | 7613       | 19754      |
| 10055     | 5167       | 5541       | 8877      | 4786       | 6492       |
| 59371     | 56153      | 55684      | 62762     | 56861      | 59881      |
| 10152     | 5470       | 8310       | 16229     | 7301       | 8746       |
| 145631    | 180596     | 174127     | 211067    | 199681     | 189006     |
| 66527     | 53270      | 46425      | 29758     | 43460      | 58873      |
| 11894     | 12824      | 10456      | 13909     | 9741       | 3858       |
| 60178     | 71523      | 48681      | 44450     | 52289      | 53119      |
| 25877     | 23214      | 21456      | 25004     | 21061      | 19783      |
| 13058     | 10558      | 12436      | 20346     | 12362      | 12048      |

|          |        |          |          |           |          |
|----------|--------|----------|----------|-----------|----------|
| 29994    | 29146  | 28647    | 26851    | 28743     | 26340    |
| 25406    | 24798  | 24659    | 25889    | 23000     | 25504    |
| 36338    | 41517  | 40787    | 35884    | 36267     | 37616    |
| 31241    | 31576  | 26878    | 28900    | 27076     | 27827    |
| 74941    | 88598  | 82012    | 75498    | 125327    | 101760   |
| 41072    | 28313  | 39245    | 39421    | 49372     | 38441    |
| 61580    | 63436  | 55143    | 66079    | 57139     | 60406    |
| 231370   | 214455 | 249360.5 | 253074   | 176961.5  | 158127.5 |
| 23638    | 26789  | 36370    | 31505    | 18894     | 11781    |
| 36801    | 25203  | 4986     | 82907    | 30209     | 14720    |
| 29414    | 37653  | 31648    | 20280    | 59337     | 67316    |
| 2790     | 3282   | 2179     | 2574     | 2371      | 2148     |
| 184338   | 220296 | 216167   | 239921   | 230648    | 236862   |
| 35023    | 29014  | 32607    | 37944    | 26694     | 28247    |
| 42786    | 194159 | 36246    | 77536    | 103236    | 100861   |
| 94191    | 95012  | 84105    | 117556   | 97423     | 93585    |
| 3291     | 3238   | 2816     | 2572     | 3565      | 2933     |
| 375003   | 369161 | 471293   | 475688   | 384972    | 431339   |
| 6587     | 6502   | 8391     | 6984     | 6899      | 6723     |
| 4320     | 4352   | 4763     | 4685     | 4067      | 3908     |
| 6595     | 3867   | 6541     | 6759     | 5093      | 4390     |
| 13728    | 10630  | 13650    | 17043    | 12456     | 13889    |
| 209087   | 80469  | 78043    | 193250   | 130364    | 135888   |
| 4211     | 3152   | 4610     | 4946     | 3391      | 4473     |
| 9919     | 7370   | 9296     | 9151     | 7268      | 7357     |
| 45735    | 42371  | 58578    | 34815    | 57017     | 54828    |
| 4462     | 3824   | 4458     | 4002     | 3774      | 4393     |
| 24822    | 28841  | 30706    | 32111    | 52997     | 61577    |
| 98931    | 101129 | 115373   | 92334    | 92154     | 92706    |
| 2794     | 2202   | 2389     | 2944     | 3158      | 2787     |
| 396      | 531    | 439      | 336      | 503       | 670      |
| 737268   | 88878  | 142974   | 145607   | 94085     | 99354    |
| 10252    | 1464   | 1407     | 1610     | 1698      | 2207     |
| 91687    | 42351  | 89221    | 96871    | 43330     | 38145    |
| 36048    | 35742  | 39405    | 39974    | 52837     | 45979    |
| 21577    | 21158  | 20815    | 19713    | 20748     | 20379    |
| 1586     | 1827   | 1821.5   | 1731.5   | 1947      | 1814     |
| 8169     | 9339   | 12827    | 10162    | 14687     | 14561    |
| 24141    | 19429  | 13800    | 27225    | 17752     | 21549    |
| 208838   | 190423 | 153827   | 188427   | 171863    | 168493   |
| 849072   | 776652 | 678176   | 781971   | 631711    | 720599   |
| 4272.5   | 2916.5 | 6337.5   | 3941.5   | 1293      | 3796     |
| 1409     | 2218   | 278      | 934      | 2905      | 3074     |
| 20236    | 21056  | 19840    | 18698    | 20900     | 20068    |
| 350793.5 | 524478 | 487384.5 | 340842.5 | 1166266.5 | 1168284  |
| 9183     | 7809   | 7976     | 8141     | 10091     | 8702     |
| 34163    | 35917  | 29455    | 38647    | 31047     | 36900    |
| 32621    | 32422  | 31004    | 49883    | 32953     | 30143    |



|          |          |          |          |          |          |
|----------|----------|----------|----------|----------|----------|
| 14676    | 9279     | 11650    | 14208    | 8345     | 9453     |
| 7572     | 11701    | 9666     | 8546     | 9400     | 10055    |
| 17749    | 16760    | 16609    | 22575    | 18387    | 12568    |
| 3840     | 5657     | 4434     | 6628     | 6890     | 7359     |
| 393571   | 265001   | 241817   | 375761   | 233619   | 234294   |
| 67990    | 42742    | 65939    | 51460    | 41974    | 49610    |
| 27767    | 20993    | 27077    | 29879    | 14697    | 19016    |
| 30617    | 34896    | 33682    | 38281    | 32461    | 41074    |
| 22916    | 35407    | 26341    | 32156    | 32384    | 35826    |
| 1047710  | 808183   | 1030693  | 1012585  | 776245   | 683844   |
| 370452   | 343583   | 249441   | 220380   | 254473   | 243060   |
| 583760   | 455612   | 438465   | 539021   | 488685   | 479018   |
| 1882     | 3227     | 1596     | 1774     | 4966     | 5369     |
| 19307    | 18104    | 17725    | 18284    | 17400    | 18131    |
| 45191    | 41402    | 41737    | 44582    | 40641    | 42215    |
| 42235295 | 38076954 | 32343070 | 40624199 | 43471048 | 41659916 |
| 236399   | 153625   | 134059   | 220956   | 209870   | 199508   |
| 12605248 | 11401348 | 10091866 | 11323807 | 14452816 | 14102130 |
| 3045822  | 3027346  | 3239772  | 3209934  | 3080599  | 2993207  |
| 55642    | 52606    | 48495    | 50340    | 63856    | 60898    |
| 798953   | 747819   | 628265   | 898668   | 902365   | 861359   |
| 393766   | 299609   | 253545   | 350401   | 388331   | 393329   |
| 5190665  | 3449753  | 3055822  | 5523721  | 3908454  | 4169266  |
| 83340    | 48290    | 41397    | 61302    | 49427    | 49245    |
| 49544    | 81945    | 23474    | 69952    | 70704    | 57265    |
| 29265    | 26686    | 19503    | 28441    | 25387    | 39115    |
| 1068     | 340      | 1434     | 1367     | 281      | 657      |
| 240026   | 258001   | 204053   | 233483   | 196229   | 244002   |
| 45350    | 68726    | 40447    | 52468    | 47622    | 54596    |
| 6511     | 3748     | 3134     | 3864     | 5300     | 4982     |
| 160938   | 263798   | 128129   | 132664   | 290042   | 241651   |
| 5919     | 4629     | 9069     | 9675     | 7047     | 4860     |
| 20674    | 16664    | 17564    | 20612    | 20836    | 22325    |
| 1972     | 8166     | 639      | 4691     | 5131     | 591      |
| 7662     | 6785     | 7761     | 8597     | 7019     | 9739     |
| 33939    | 34643    | 32981    | 38744    | 26303    | 30015    |
| 3100     | 3386     | 7261     | 5674     | 4707     | 4938     |
| 44015    | 85712    | 57197    | 63208    | 51392    | 51315    |
| 42008    | 23933    | 23756    | 35648    | 22147    | 30662    |
| 166474   | 130791   | 147355   | 129801   | 109095   | 113129   |
| 15214    | 16887    | 14155    | 15783    | 16053    | 14568    |
| 688866   | 632751   | 528537   | 664103   | 530316   | 584653   |
| 31288    | 96295    | 56080    | 65237    | 67054    | 72537    |
| 43875    | 42477    | 32715    | 43717    | 36731    | 32139    |
| 11430    | 6039     | 10444    | 9137     | 38570    | 20813    |
| 4508     | 4583     | 3422     | 2804     | 7395     | 6870     |
| 13674    | 20233    | 16101    | 19516    | 51936    | 32099    |
| 20655    | 12893    | 15182    | 17604    | 15939    | 15548    |

|         |         |         |         |         |         |
|---------|---------|---------|---------|---------|---------|
| 18257   | 34298   | 10087   | 24013   | 29687   | 19147   |
| 6998    | 6383    | 14018   | 7863    | 9861    | 9124    |
| 20236   | 23021   | 22218   | 14367   | 17107   | 18809   |
| 86813   | 60975   | 113212  | 135571  | 86333   | 83481   |
| 106225  | 107185  | 96712   | 102901  | 103337  | 113900  |
| 46257   | 57422   | 61361   | 58587   | 60049   | 57582   |
| 346259  | 369453  | 341538  | 390645  | 418849  | 471827  |
| 672263  | 506259  | 426772  | 591823  | 617069  | 627860  |
| 25352   | 25063   | 23413   | 25471   | 22686   | 21308   |
| 25211   | 27106   | 26068   | 24796   | 28044   | 24804   |
| 8128    | 7508    | 7966    | 7412    | 7674    | 8945    |
| 45739   | 43816   | 43654   | 45723   | 41233   | 45509   |
| 9395    | 8985    | 8842    | 8553    | 8788    | 8698    |
| 9785    | 9733    | 10702   | 9562    | 11074   | 9633    |
| 2560    | 1685    | 2301    | 3184    | 3037    | 2442    |
| 21828   | 21255   | 21483   | 22368   | 21331   | 21283   |
| 2921    | 2815    | 3110    | 3162    | 4140    | 3039    |
| 4447    | 4900    | 5052    | 4371    | 5950    | 5098    |
| 10934   | 10421   | 10535   | 9612    | 11065   | 10355   |
| 2768    | 2306    | 2137    | 2608    | 2472    | 3028    |
| 14478   | 12885   | 12663   | 14372   | 9458    | 11451   |
| 3812    | 3662    | 3468    | 2856    | 3008    | 3031    |
| 39002   | 37285   | 37682   | 38194   | 32660   | 36366   |
| 31283   | 30005   | 28324   | 30219   | 22967   | 26473   |
| 4547    | 4295    | 4311    | 4322    | 4224    | 4929    |
| 12956   | 12216   | 11540   | 13273   | 13233   | 13265   |
| 24052   | 22946   | 20192   | 23761   | 19428   | 20360   |
| 33547   | 31186   | 30341   | 35009   | 26091   | 27020   |
| 42866   | 40658   | 38704   | 42467   | 40178   | 42025   |
| 178935  | 227313  | 168631  | 203421  | 267674  | 246413  |
| 2367    | 2425    | 2199    | 2249    | 2755    | 1968    |
| 23827   | 29448   | 26976   | 27624   | 24085   | 26297   |
| 93299   | 71520   | 72969   | 63195   | 50738   | 49068   |
| 19305   | 22173   | 16216   | 16048   | 21793   | 19700   |
| 773     | 754     | 965     | 651     | 592     | 674     |
| 4024217 | 4646095 | 4164346 | 3711919 | 4442571 | 4454491 |
| 4505    | 3478    | 1208    | 2657    | 2041    | 2012    |
| 19614   | 17257   | 15894   | 21037   | 15350   | 14958   |
| 11322   | 5313    | 9567    | 18628   | 1069    | 8318    |
| 253072  | 109644  | 212317  | 457834  | 1718    | 75921   |
| 16612   | 7886    | 15196   | 25562   | 2292    | 3130    |
| 15304   | 16136   | 19108   | 20072   | 17034   | 20368   |
| 77356   | 55792   | 52730   | 69805   | 47538   | 55108   |
| 4364    | 5490    | 6981    | 4182    | 5963    | 4627    |
| 98202   | 72088   | 99580   | 91481   | 61791   | 46447   |
| 19152   | 18987   | 19251   | 21386   | 20780   | 21433   |
| 6647    | 1121    | 1291    | 7401    | 2496    | 2819    |
| 12895   | 11622   | 11769   | 12288   | 11908   | 12297   |

|         |         |         |         |         |         |
|---------|---------|---------|---------|---------|---------|
| 26070   | 24603   | 23235   | 27062   | 20693   | 21026   |
| 2968    | 2424    | 2614    | 2444    | 2811    | 2509    |
| 39875   | 34717   | 33594   | 40315   | 28789   | 32796   |
| 23968   | 20257   | 19865   | 24342   | 16683   | 15529   |
| 43033   | 40561   | 39822   | 42346   | 39253   | 39976   |
| 15929   | 14666   | 15052   | 14988   | 13931   | 13418   |
| 14091   | 13481   | 13481   | 15050   | 12348   | 12664   |
| 23558   | 12560   | 12034   | 17936   | 13403   | 14365   |
| 696873  | 524955  | 488178  | 537847  | 516917  | 553358  |
| 402181  | 190801  | 205139  | 341262  | 160650  | 210885  |
| 39955   | 28677   | 32813   | 36338   | 33043   | 32115   |
| 1516    | 2600    | 2306    | 1489    | 2316    | 2537    |
| 148840  | 158700  | 137944  | 128995  | 130049  | 128412  |
| 2620773 | 4091198 | 3265294 | 2659194 | 4894697 | 4618827 |
| 125696  | 180665  | 170471  | 101936  | 246667  | 296679  |
| 29782   | 53751   | 42283   | 24744   | 68371   | 68109   |
| 304982  | 575841  | 436667  | 274015  | 624667  | 620536  |
| 147995  | 134627  | 134475  | 142058  | 113895  | 106284  |
| 42275   | 40887   | 42201   | 35601   | 57974   | 51872   |
| 19428   | 18396   | 13526   | 11512   | 30376   | 33128   |
| 3725    | 4806    | 1265    | 3200    | 9305    | 6749    |
| 128482  | 114227  | 101268  | 115182  | 136389  | 141214  |
| 38689   | 51709   | 28993   | 22940   | 24945   | 45024   |
| 237373  | 202392  | 114585  | 171523  | 185142  | 253100  |
| 32318   | 39278   | 28080   | 39073   | 36578   | 36807   |
| 1445    | 674     | 410     | 1164    | 2582    | 3322    |
| 322078  | 283727  | 231971  | 356156  | 380653  | 374306  |
| 41479   | 36799   | 30087   | 35570   | 37954   | 38734   |
| 65529   | 58902   | 58364   | 64246   | 63487   | 73919   |
| 8977    | 17149   | 21990   | 7872    | 11062   | 12223   |
| 12063   | 13157   | 11023   | 11615   | 12096   | 11773   |
| 10315   | 10008   | 9196    | 9944    | 10770   | 8844    |
| 1905    | 1885    | 2068    | 1456    | 1870    | 2206    |
| 4170    | 3547    | 3462    | 3969    | 4469    | 4368    |
| 3917    | 3726    | 3929    | 5360    | 5029    | 4948    |
| 4698    | 4106    | 4316    | 4498    | 5185    | 5352    |
| 7691    | 6069    | 6468    | 6214    | 8955    | 8506    |
| 6167    | 6490    | 5872    | 6097    | 5664    | 5114    |
| 4637    | 4709    | 5726    | 4452    | 4278    | 3816    |
| 1007    | 1213    | 958     | 1336    | 1068    | 1058    |
| 114443  | 151962  | 146895  | 153331  | 136453  | 127231  |
| 89408   | 89540   | 88139   | 102236  | 83615   | 72653   |
| 4800    | 5078    | 3447    | 5035    | 4419    | 4319    |
| 43614   | 34652   | 39538   | 41508   | 52124   | 49451   |
| 3518620 | 5156258 | 4093086 | 4149550 | 3524978 | 4561351 |
| 533210  | 821079  | 603982  | 615262  | 560161  | 629341  |
| 966234  | 746020  | 288032  | 559842  | 712697  | 738789  |
| 61531   | 52400   | 33783   | 60244   | 52220   | 50024   |

|       |       |       |       |       |       |
|-------|-------|-------|-------|-------|-------|
| 917   | 777   | 344   | 381   | 780   | 846   |
| 2940  | 3505  | 790   | 8215  | 2760  | 203   |
| 2016  | 1348  | 664   | 1192  | 1324  | 1432  |
| 14396 | 16882 | 11118 | 14332 | 14812 | 17173 |

| QC3     | QC4     | QC5     | QC6     | NOTES                          |
|---------|---------|---------|---------|--------------------------------|
| 496     | 779     | 690     | 827     | Group B = T2D mice receiving T |
| 1481    | 3177    | 3152    | 3781    | Group C = T2D mice receiving C |
| 1155    | 928     | 460     | 577     | QC = Quality Control samples   |
| 264576  | 255220  | 267218  | 260239  | RT, retention time             |
| 21784   | 21204   | 20687   | 21334   |                                |
| 761     | 2221    | 1056    | 2139    |                                |
| 14090   | 14097   | 14220   | 14748   |                                |
| 17721   | 16868   | 16704   | 15849   |                                |
| 10744   | 10374   | 10466   | 9768    |                                |
| 223359  | 199557  | 215711  | 221077  |                                |
| 1208247 | 1035838 | 1321277 | 1109618 |                                |
| 74409   | 60576   | 59669   | 68823   |                                |
| 2437    | 1828    | 5182    | 5107    |                                |
| 62683   | 69019   | 68018   | 70802   |                                |
| 23684   | 18949   | 20235   | 17355   |                                |
| 3128    | 2734    | 3101    | 2646    |                                |
| 13251   | 23716   | 24950   | 29923   |                                |
| 132859  | 148807  | 140048  | 141502  |                                |
| 3751    | 3076    | 4097    | 2948    |                                |
| 3946    | 2843    | 2300    | 2716    |                                |
| 10646   | 9157    | 10384   | 11490   |                                |
| 8112    | 7910    | 7067    | 7617    |                                |
| 116640  | 108156  | 92989   | 95598   |                                |
| 19627   | 24585   | 25591   | 26701   |                                |
| 10086   | 8608    | 9814    | 8822    |                                |
| 91912   | 91002   | 130112  | 138476  |                                |
| 9849    | 9286    | 9329    | 10344   |                                |
| 100966  | 102910  | 106941  | 108573  |                                |
| 144858  | 153136  | 157784  | 152117  |                                |
| 25112   | 26206   | 26285   | 27282   |                                |
| 178340  | 221502  | 267782  | 313022  |                                |
| 144345  | 186566  | 159869  | 160437  |                                |
| 51948   | 50064   | 49271   | 51118   |                                |
| 175     | 0       | 903     | 612     |                                |
| 3169    | 4226    | 3529    | 3706    |                                |
| 13245   | 15220   | 15306   | 16771   |                                |
| 7082    | 7338    | 6042    | 6715    |                                |
| 8746    | 15671   | 8316    | 14394   |                                |
| 7369    | 7420    | 7459    | 7093    |                                |
| 53537   | 49888   | 55345   | 55485   |                                |
| 4456    | 5122    | 5552    | 4051    |                                |
| 190776  | 137116  | 143117  | 148039  |                                |
| 60608   | 51617   | 62114   | 57685   |                                |
| 11577   | 10919   | 15936   | 14910   |                                |
| 54953   | 47485   | 51353   | 48709   |                                |
| 21085   | 18052   | 16879   | 16713   |                                |
| 14265   | 17109   | 14433   | 13903   |                                |

|           |           |           |           |  |
|-----------|-----------|-----------|-----------|--|
| 28464     | 30612     | 28889     | 28746     |  |
| 24984     | 24802     | 24158     | 25212     |  |
| 36756     | 34661     | 36437     | 30834     |  |
| 26110     | 24576     | 27924     | 27419     |  |
| 107811    | 97002     | 90204     | 90408     |  |
| 40249     | 64379     | 72657     | 65280     |  |
| 53655     | 52899     | 62242     | 56293     |  |
| 225386    | 233439    | 347531    | 344589    |  |
| 23021     | 25225     | 37817     | 41282     |  |
| 19681     | 9543      | 27305     | 15942     |  |
| 60543     | 62053     | 56322     | 64049     |  |
| 2736      | 3482      | 3194      | 3727      |  |
| 248075    | 243447    | 237001    | 236961    |  |
| 28800     | 29374     | 30117     | 31516     |  |
| 95786     | 113706    | 97411     | 102044    |  |
| 87710     | 95308     | 107270    | 80258     |  |
| 2948      | 2481      | 2785      | 3794      |  |
| 382396    | 411051    | 363609    | 376240    |  |
| 7464      | 7826      | 7174      | 7760      |  |
| 4609      | 4351      | 5190      | 4333      |  |
| 5710      | 7451      | 8470      | 9488      |  |
| 15719     | 17848     | 18999     | 18830     |  |
| 133623    | 117834    | 129025    | 120526    |  |
| 4407      | 5848      | 6442      | 6757      |  |
| 7701      | 7843      | 6947      | 8731      |  |
| 39230     | 52176     | 56251     | 59399     |  |
| 4026      | 3990      | 4344      | 5046      |  |
| 58077     | 58269     | 57677     | 59052     |  |
| 95468     | 82286     | 78693     | 84278     |  |
| 2971      | 3092      | 3252      | 2764      |  |
| 506       | 393       | 564       | 448       |  |
| 101103    | 108236    | 118887    | 103324    |  |
| 1766      | 1839      | 1191      | 2304      |  |
| 26628     | 90872     | 75595     | 82845     |  |
| 47645     | 45737     | 54592     | 45940     |  |
| 19381     | 20735     | 20756     | 21327     |  |
| 1906.5    | 1655      | 1743.5    | 1953      |  |
| 13995     | 17302     | 17052     | 16616     |  |
| 22195     | 26790     | 24324     | 22792     |  |
| 177177    | 177715    | 183968    | 186514    |  |
| 764921    | 847030    | 803280    | 821802    |  |
| 1725.5    | 5146      | 2724.5    | 4114      |  |
| 2925      | 3290      | 3364      | 3097      |  |
| 18708     | 16460     | 17460     | 18986     |  |
| 1144274.5 | 1068329.5 | 1024685.5 | 1133062.5 |  |
| 9878      | 10561     | 9376      | 9348      |  |
| 36428     | 39344     | 39930     | 39773     |  |
| 31968     | 35226     | 35649     | 36278     |  |

|          |          |          |          |  |
|----------|----------|----------|----------|--|
| 10987    | 13619    | 13826    | 13133    |  |
| 8090     | 9359     | 7362     | 8193     |  |
| 21278    | 22022    | 23174    | 16393    |  |
| 7265     | 5668     | 7713     | 5819     |  |
| 243539   | 260392   | 275984   | 266073   |  |
| 54585    | 56663    | 53059    | 63576    |  |
| 19546    | 26739    | 27813    | 29041    |  |
| 37858    | 35021    | 34597    | 37517    |  |
| 42064    | 46875    | 35009    | 34840    |  |
| 1007118  | 927460   | 1378381  | 1265738  |  |
| 258127   | 252435   | 338474   | 450331   |  |
| 497292   | 502513   | 572266   | 568186   |  |
| 5408     | 5018     | 5006     | 4411     |  |
| 19508    | 17170    | 18897    | 18363    |  |
| 45325    | 40446    | 37366    | 41152    |  |
| 41583753 | 36209624 | 36759856 | 39036058 |  |
| 220134   | 187342   | 177582   | 179689   |  |
| 14261496 | 11907959 | 11350959 | 11212320 |  |
| 3080152  | 2808853  | 2835674  | 2930849  |  |
| 64820    | 61810    | 61896    | 60112    |  |
| 846103   | 707103   | 650778   | 712258   |  |
| 374291   | 347815   | 342837   | 352743   |  |
| 4049326  | 3798235  | 3817772  | 3684729  |  |
| 57202    | 61847    | 60971    | 60498    |  |
| 66718    | 43675    | 73355    | 57074    |  |
| 63158    | 39378    | 30605    | 35138    |  |
| 104      | 1597     | 435      | 1220     |  |
| 309913   | 250997   | 283918   | 244724   |  |
| 61322    | 72353    | 51315    | 53478    |  |
| 5867     | 4804     | 5597     | 4610     |  |
| 237747   | 137724   | 134973   | 132865   |  |
| 5062     | 11661    | 12635    | 9596     |  |
| 24388    | 27021    | 24094    | 26417    |  |
| 1668     | 2050     | 1066     | 1111     |  |
| 6738     | 7450     | 8312     | 6584     |  |
| 23172    | 23866    | 28259    | 30941    |  |
| 3677     | 4753     | 6169     | 5012     |  |
| 47801    | 51158    | 52018    | 53638    |  |
| 23344    | 35228    | 29899    | 31680    |  |
| 111730   | 136898   | 119084   | 128770   |  |
| 16232    | 18096    | 21433    | 22121    |  |
| 598845   | 805464   | 709613   | 684555   |  |
| 63193    | 44578    | 38391    | 43345    |  |
| 34415    | 35412    | 39078    | 34857    |  |
| 36276    | 35967    | 50761    | 32882    |  |
| 7663     | 7189     | 9105     | 9289     |  |
| 53129    | 36347    | 69288    | 62422    |  |
| 18113    | 19695    | 19022    | 19338    |  |

|         |         |         |         |  |
|---------|---------|---------|---------|--|
| 23830   | 14760   | 20473   | 16973   |  |
| 10195   | 11443   | 11622   | 9581    |  |
| 18390   | 11766   | 8412    | 6450    |  |
| 72083   | 91854   | 99776   | 138125  |  |
| 112877  | 101705  | 103190  | 101887  |  |
| 62726   | 44246   | 52398   | 43817   |  |
| 500283  | 436194  | 373422  | 441866  |  |
| 590886  | 526478  | 486326  | 524360  |  |
| 21922   | 21131   | 22400   | 21693   |  |
| 26036   | 29045   | 26933   | 26728   |  |
| 8705    | 8402    | 8296    | 8278    |  |
| 46049   | 45062   | 45620   | 44975   |  |
| 8866    | 8432    | 8755    | 8560    |  |
| 9584    | 10385   | 10212   | 10152   |  |
| 2613    | 3639    | 2890    | 2523    |  |
| 21128   | 23054   | 22078   | 22673   |  |
| 3507    | 4069    | 3891    | 3273    |  |
| 5387    | 5665    | 5093    | 5223    |  |
| 11149   | 10995   | 12048   | 11066   |  |
| 2400    | 2778    | 2650    | 2730    |  |
| 10281   | 11243   | 11629   | 11912   |  |
| 3033    | 2957    | 3691    | 3380    |  |
| 36975   | 35307   | 37118   | 38740   |  |
| 27696   | 26300   | 27248   | 28007   |  |
| 4714    | 5103    | 5217    | 3912    |  |
| 12266   | 12937   | 13338   | 13683   |  |
| 19876   | 20269   | 21791   | 22324   |  |
| 26594   | 28522   | 29944   | 30311   |  |
| 39756   | 40937   | 39928   | 41319   |  |
| 233884  | 196530  | 199280  | 195729  |  |
| 1782    | 2654    | 2427    | 2253    |  |
| 25271   | 25698   | 23712   | 24894   |  |
| 40412   | 44685   | 42431   | 40109   |  |
| 19006   | 12373   | 13841   | 12936   |  |
| 785     | 562     | 718     | 613     |  |
| 4564657 | 4503060 | 4760055 | 4498496 |  |
| 2397    | 2553    | 1845    | 3598    |  |
| 14498   | 14636   | 14630   | 14678   |  |
| 7602    | 16738   | 25034   | 32928   |  |
| 195576  | 462884  | 652394  | 840806  |  |
| 6139    | 51941   | 112198  | 57923   |  |
| 24716   | 75582   | 75323   | 48092   |  |
| 59098   | 66459   | 68716   | 62192   |  |
| 5114    | 3617    | 4778    | 4822    |  |
| 83781   | 85113   | 139485  | 138109  |  |
| 21805   | 20763   | 20864   | 20221   |  |
| 2871    | 2805    | 3258    | 3043    |  |
| 11233   | 12303   | 12729   | 12826   |  |



|         |         |         |         |  |
|---------|---------|---------|---------|--|
| 21180   | 21632   | 22618   | 21967   |  |
| 2667    | 3121    | 3224    | 3138    |  |
| 32090   | 31732   | 34013   | 34610   |  |
| 18888   | 19232   | 19755   | 20445   |  |
| 39356   | 38310   | 40340   | 40281   |  |
| 14273   | 14404   | 14880   | 14557   |  |
| 12352   | 12620   | 13266   | 13050   |  |
| 16636   | 17982   | 17162   | 18233   |  |
| 575983  | 534847  | 704354  | 682394  |  |
| 235556  | 348480  | 399230  | 405413  |  |
| 30744   | 28094   | 31938   | 31695   |  |
| 2869    | 1766    | 3409    | 2377    |  |
| 128179  | 134891  | 127797  | 122928  |  |
| 4405466 | 4048281 | 3930727 | 3792751 |  |
| 248730  | 217043  | 184792  | 176937  |  |
| 65533   | 51369   | 48100   | 45377   |  |
| 579569  | 463952  | 443713  | 404304  |  |
| 101636  | 158569  | 148927  | 138175  |  |
| 45102   | 56639   | 58596   | 53606   |  |
| 32309   | 32493   | 40768   | 41671   |  |
| 5609    | 3809    | 3892    | 3723    |  |
| 143678  | 137261  | 134140  | 136930  |  |
| 48422   | 37596   | 28197   | 52408   |  |
| 245783  | 191595  | 236773  | 228889  |  |
| 37676   | 26005   | 26071   | 26979   |  |
| 2690    | 3300    | 4118    | 3621    |  |
| 414129  | 427242  | 443682  | 427499  |  |
| 45652   | 47750   | 61297   | 67267   |  |
| 61403   | 62213   | 64312   | 66327   |  |
| 13256   | 13591   | 13850   | 13309   |  |
| 12072   | 11655   | 14140   | 12416   |  |
| 10809   | 9077    | 11427   | 10763   |  |
| 1508    | 1632    | 1968    | 1942    |  |
| 4123    | 3293    | 3915    | 3657    |  |
| 4112    | 5040    | 4616    | 4664    |  |
| 4679    | 4163    | 4520    | 4569    |  |
| 8787    | 9352    | 9435    | 8035    |  |
| 4567    | 5230    | 4795    | 5342    |  |
| 4287    | 3642    | 3925    | 3767    |  |
| 1103    | 945     | 1012    | 1345    |  |
| 110242  | 100806  | 125076  | 123766  |  |
| 92684   | 95548   | 104453  | 79467   |  |
| 3679    | 4231    | 3963    | 4278    |  |
| 58690   | 63370   | 70190   | 65835   |  |
| 4113411 | 4635581 | 3731142 | 3977090 |  |
| 689370  | 727916  | 709867  | 624761  |  |
| 823657  | 775052  | 842126  | 813391  |  |
| 57435   | 51535   | 54308   | 53119   |  |

|       |       |       |       |  |
|-------|-------|-------|-------|--|
| 1407  | 890   | 897   | 658   |  |
| 1825  | 0     | 1910  | 1584  |  |
| 1424  | 1368  | 1176  | 1344  |  |
| 14430 | 17634 | 17003 | 15139 |  |

2D plasma  
control plasma
